# Supplementary material for: Sex-disaggregated analysis of the injury patterns, outcome data and trapped status of major trauma patients injured in motor vehicle collisions: a prespecified analysis of the UK trauma registry (TARN)
Source: PubMed Central journal article supplement — BMJ Open. 2022 May 3;12(5):e061076. doi: 10.1136/bmjopen-2022-061076 (PMC9066497; doi:10.1136/bmjopen-2022-061076), 2022-05-03
Supplement: bmjopen-2022-061076.draft_revisions.pdf [file bmjopen-2022-061076.draft_revisions.pdf]

# BMJ Open

BMJ Open is committed to open peer review. As part of this commitment we make the peer review history of every article we publish publicly available.

When an article is published we post the peer reviewers' comments and the authors' responses online. We also post the versions of the paper that were used during peer review. These are the versions that the peer review comments apply to.

The versions of the paper that follow are the versions that were submitted during the peer review process. They are not the versions of record or the final published versions. They should not be cited or distributed as the published version of this manuscript.

BMJ Open is an open access journal and the full, final, typeset and author-corrected version of record of the manuscript is available on our site with no access controls, subscription charges or pay-per-view fees (<http://bmjopen.bmj.com>).

If you have any questions on BMJ Open's open peer review process please email [info.bmjopen@bmj.com](mailto:info.bmjopen@bmj.com)

# BMJ Open

## Sex-disaggregated analysis of the injury patterns, outcome data and trapped status of major trauma patients injured in motor vehicle collisions

|                               |                                                                                                                                                                                                                                                                                                                                                                                                                                                                                                                                                                                                           |
|-------------------------------|-----------------------------------------------------------------------------------------------------------------------------------------------------------------------------------------------------------------------------------------------------------------------------------------------------------------------------------------------------------------------------------------------------------------------------------------------------------------------------------------------------------------------------------------------------------------------------------------------------------|
| Journal:                      | <i>BMJ Open</i>                                                                                                                                                                                                                                                                                                                                                                                                                                                                                                                                                                                           |
| Manuscript ID                 | bmjopen-2022-061076                                                                                                                                                                                                                                                                                                                                                                                                                                                                                                                                                                                       |
| Article Type:                 | Original research                                                                                                                                                                                                                                                                                                                                                                                                                                                                                                                                                                                         |
| Date Submitted by the Author: | 14-Jan-2022                                                                                                                                                                                                                                                                                                                                                                                                                                                                                                                                                                                               |
| Complete List of Authors:     | Nutbeam, Tim; Plymouth Hospitals NHS Foundation Trust, ; Devon Air Ambulance ,<br>Weekes, Lauren; University Hospitals Plymouth NHS Trust, Department of Anaesthesia<br>Heidari, Shirin; GENDRO<br>Fenwick, Rob; University Hospitals Birmingham NHS Foundation Trust<br>Bouamra, Omar; Trauma Audit & Research Network, Institute of Population Health<br>Smith, Jason; University Hospitals Plymouth NHS Trust, Emergency Department; Royal Centre for Defence Medicine, Academic Department of Military Emergency Medicine<br>Stassen, Willem; University of Cape Town, Division of Emergency Medicine |
| Keywords:                     | ACCIDENT & EMERGENCY MEDICINE, TRAUMA MANAGEMENT, Protocols & guidelines < HEALTH SERVICES ADMINISTRATION & MANAGEMENT                                                                                                                                                                                                                                                                                                                                                                                                                                                                                    |
|                               |                                                                                                                                                                                                                                                                                                                                                                                                                                                                                                                                                                                                           |

SCHOLARONE™  
Manuscripts

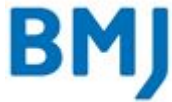

I, the Submitting Author has the right to grant and does grant on behalf of all authors of the Work (as defined in the below author licence), an exclusive licence and/or a non-exclusive licence for contributions from authors who are: i) UK Crown employees; ii) where BMJ has agreed a CC-BY licence shall apply, and/or iii) in accordance with the terms applicable for US Federal Government officers or employees acting as part of their official duties; on a worldwide, perpetual, irrevocable, royalty-free basis to BMJ Publishing Group Ltd ("BMJ") its licensees and where the relevant Journal is co-owned by BMJ to the co-owners of the Journal, to publish the Work in this journal and any other BMJ products and to exploit all rights, as set out in our [licence](#).

The Submitting Author accepts and understands that any supply made under these terms is made by BMJ to the Submitting Author unless you are acting as an employee on behalf of your employer or a postgraduate student of an affiliated institution which is paying any applicable article publishing charge ("APC") for Open Access articles. Where the Submitting Author wishes to make the Work available on an Open Access basis (and intends to pay the relevant APC), the terms of reuse of such Open Access shall be governed by a Creative Commons licence – details of these licences and which [Creative Commons](#) licence will apply to this Work are set out in our licence referred to above.

Other than as permitted in any relevant BMJ Author's Self Archiving Policies, I confirm this Work has not been accepted for publication elsewhere, is not being considered for publication elsewhere and does not duplicate material already published. I confirm all authors consent to publication of this Work and authorise the granting of this licence.

1  
2  
3 **Sex-disaggregated analysis of the injury patterns, outcome data and trapped status of major**  
4 **trauma patients injured in motor vehicle collisions**  
5  
6  
7  
8  
9

10 Tim Nutbeam, Lauren Weekes, Shirin Heidari, Rob Fenwick, Omar Bouamra, Jason Smith, Willem  
11  
12 Stassen  
13  
14  
15  
16

- 17 1) Tim Nutbeam, Emergency Department, University Hospitals Plymouth NHS Trust, Plymouth,  
18 UK. Devon Air Ambulance Trust, UK, Division of Emergency Medicine, University of Cape  
19 Town, Cape Town, South Africa [timnutbeam@nhs.net](mailto:timnutbeam@nhs.net), @timnutbeam (corresponding  
20 author).  
21  
22  
23  
24  
25  
26 2) Lauren Weekes, Department of Anaesthesia, University Hospitals Plymouth NHS Trust,  
27 Plymouth, UK. Devon Air Ambulance Trust, UK.  
28  
29  
30 3) Shirin Heidari, Founder and President, GENDRO, Switzerland  
31  
32  
33 4) Rob Fenwick, University Hospitals Birmingham, UK.  
34  
35 5) Omar Bouamra, Trauma Audit Research Network, University of Manchester, Manchester,  
36 UK.  
37  
38  
39 6) Jason Smith, University Hospitals Plymouth NHS Trust, Plymouth, UK.  
40  
41  
42 7) Willem Stassen, Division of Emergency Medicine, University of Cape Town, Cape Town,  
43 South Africa  
44  
45  
46  
47  
48  
49  
50  
51  
52  
53  
54  
55  
56  
57  
58  
59  
60

**Abstract:**

**Objectives:** To identify the differences between women and men in the probability of entrapment, frequency of injury, and outcomes following a Motor Vehicle Collision. Publishing sex-disaggregated data, understanding differential patterns and exploring the reasons for these will assist with ensuring equity of outcomes especially in respect to triaging, rescuing and treating all patients.

**Design:** We examined data from the Trauma Audit Research Network (TARN) registry to explore sex differences in entrapment, injuries and outcomes. We explored the relationship between age, sex and trapped status using multivariate logistical regression.

**Setting:** TARN is a UK based trauma registry covering England and Wales.

**Participants:** We examined data for 450,357 patients submitted to TARN during the study period (2012-2019) of which 70 027 met the inclusion criteria. There were 18,175 (26%) females and 51,852 (74%) males.

**Primary and secondary outcome measures:** We report difference in entrapment status, injury and outcome between females and males. For trapped patients we examined the effect of sex and age on death from any cause.

**Results:**

Females were more frequently trapped than males ( $p < 0.0001$ ). In trapped patients, males more frequently suffered head, face, thoracic and limb injuries (all  $p < 0.0001$ ). Females had more injuries to the pelvis ( $p < 0.0001$ ) and spine ( $p < 0.001$ ). Following adjustment for the interaction between age and sex, ISS, GCS and the Charlson comorbidity index, no difference in mortality was found between females and males.

**Conclusions:**

There are significant differences between females and males in the frequency at which patients are trapped and the injuries these patients sustain. This sex-disaggregated data may help vehicle manufacturers, road safety organisations and emergency services to tailor responses with the aim of equitable outcomes by targeting equal performance of safety measures and reducing excessive risk to one sex or gender.

**Strengths and limitations of this study:**

- We include data from 70,027 patients over a 8-year time period.
- The source dataset is of high quality; the Trauma Audit and Research Network (TARN).
- The dataset does not allow clear differentiation between patients that are 'medically trapped (e.g., due to pain) or 'physically trapped' (e.g. due to intrusion into the vehicle)
- We pre-specified to minimise bias but the inherent concerns of a retrospective cohort analysis remain.
- We only include patients who meet the threshold for inclusion to TARN and therefore miss MVCs where severe injury did not occur.

1  
2  
3 **Key words:**  
4

5  
6  
7 Extrication  
8

9  
10 Sex  
11

12 Gender  
13

14  
15 Motor Vehicle Collision  
16

17 Accidents, traffic  
18

19  
20 Spinal injuries  
21

22  
23 Pre-hospital care  
24

25  
26 Emergency Medical Services  
27  
28  
29  
30  
31  
32  
33  
34  
35  
36  
37  
38  
39  
40  
41  
42  
43  
44  
45  
46  
47  
48  
49  
50  
51  
52  
53  
54  
55  
56  
57  
58  
59  
60

For peer review only

**Background:**

An introduction to sex and gender:

Sex refers to the biological attributes of humans and animals associated with physical and physiological characteristics such as reproductive anatomy, gene expression, chromosomes and hormone profiles. It is usually categorized as male or female, although there are other variations in sex characteristics [1].

Gender refers to the societal overlay of roles, behaviours and identities ascribed to individuals. It influences how people see themselves, how they are perceived by others; societal bias affects distribution of power and resources. Gender identity refers to individual's deeply felt internal and individual experience of gender. Gender identity is a spectrum and are not restricted to man and woman. An individual's gender identity may differ from their sex assigned at birth [1].

Research outcomes may depend on patient sex (such as medication trials, where sex hormones may affect efficacy), gender (e.g., in trials where actual or perceived behavioural differences may be important) or both. The TARN dataset includes sex as recorded on the hospital notes and may represent either sex assigned at birth or gender.

Historical epidemiological data describe major trauma secondary to injury in the UK as predominantly a disease of young men [2]. More recent analysis demonstrates that this paradigm no longer applies, with particular focus on the burden of trauma in the older population [3,4]. Despite increasing awareness of these changing demographics, trauma systems remain tuned to recognising and treating historical perceived norms [4,5].

Motor vehicle collisions (MVCs) are a significant cause of morbidity and mortality throughout the world accounting for 1.35 million deaths and between 20 and 50 million injuries worldwide per annum [5]. To our knowledge no studies have considered the differences in injury patterns, entrapment status and morbidity and mortality outcomes between females and males. Failure to collect and analyse sex-disaggregated data is a common concern in research; whilst most studies present baseline demographic data by sex, far fewer report outcome data by sex or conduct sex and gender-based analysis (SGBA) [1,6]. Failure to carry out SGBA can have serious consequences for patient outcome. As an example, females are 50% more likely to be misdiagnosed when experiencing a myocardial infarction due to persistent gender-blind research which overlooked



1  
2  
3 different presentation of symptoms in women compared to men. Women's symptoms have been  
4 labelled 'atypical' despite being experienced by half of the population [7].  
5  
6

7 Following an MVC some occupants will be 'trapped' and be unable to exit the vehicle without  
8 assistance [8]. Those who are physically trapped will require the assistance of fire and rescue  
9 services to perform a mechanical intervention to the vehicle to create space for extrication [9].  
10 Patients who are medically trapped due to pain or disability will require physical assistance,  
11 analgesia and the application of spinal precautions or reassurance that such precautions are not  
12 required. Patients who are trapped have worse outcomes than those who are not trapped [8].  
13  
14  
15  
16  
17  
18

19 We could find no previous sex-disaggregated data which report injury patterns for patients trapped  
20 following an MVC. This information would be useful for those triaging, rescuing or treating patients.  
21 There may be additional value of sex-disaggregated data to target public health interventions, road  
22 planning and the design of safety systems such as restraint devices and airbags.  
23  
24  
25  
26  
27

28 The aims of this study were to define the probability of entrapment, frequency of injury, and  
29 outcomes by the sex of the casualty.  
30  
31  
32  
33  
34  
35  
36  
37  
38  
39  
40  
41  
42  
43  
44  
45  
46  
47  
48  
49  
50  
51  
52  
53  
54  
55  
56  
57  
58  
59  
60

## Methods:

A retrospective review of the UK Trauma Audit and Research Network (TARN) database was carried out including patients injured between 1<sup>st</sup> January 2012 and 31<sup>st</sup> December 2019. TARN collects data from Major Trauma Centres and Trauma Units in the UK. Eligibility criteria for inclusion in the TARN database include trauma patients who are admitted to hospital for  $\geq 72$  hours, admitted to a critical care unit, who die in hospital or are transferred to another hospital for specialist care. Pre-hospital deaths and isolated closed fractures of the limbs and hip fractures in patients over the age of 65 are not included. TARN includes routine data on patient demographics, physiology, interventions, injuries and in some circumstances (including MVCs) the trapped status of the patient.

Inclusion criteria were patients aged 16 years or older, with mechanism coded as "Vehicle Incident/Collision", directly admitted to a TARN participating hospital in England and with complete documented outcomes. To ensure data quality, patients were excluded if they underwent secondary transfer from another hospital or when the trapped status was not documented on the database.

For patients that met the inclusion criteria, data fields including sex, age, trapped status, injury severity score (ISS), abbreviated injury scale (AIS) for each body region, any details of spinal injury and significant time dependent injuries as described in previous work were made available for analysis [8].

Simple descriptive analysis was used to define the characteristics of the female and male groups. Levene's test was used to assess equality of variances and a two-tailed t-test to compare means and Mann-Whitney test for comparing medians. Chi square test was used for categorical variables. *P* values of less than 0.01 were considered significant due to multiple analyses being performed. The relationship between age, sex, and trapped status was explored further using multivariate logistical regression. SPSS (IBM Corp v.23 Armonk, NY) and Stata (StataCorp. 2015. Stata Statistical Software: Release 14. College Station, TX) were used for the analyses.

TARN data analyses are conducted using anonymised data which is governed by a code of practice approved by the Confidentiality Advisory Group who are appointed by the Health Research Authority. Additional individual ethical approval was not required for this analysis.

**Patient and public involvement:**

TARN has patient and public involvement on the TARN Board which has oversight of the research portfolio in addition we sought the opinions of the advocacy group GENDRO on our analysis plan.

**Results:**

Between 2012 and 2019, there were 450 437 cases identified on the TARN database. Following exclusions, data for 70,027 patients with a known trapped status were analysed (Figure 1).

**Figure 1: Strobe Diagram**

The characteristics of each group are summarized in Table 1. Twenty-six percent of patients were female. The average age (SD) across all eligible patients was 46.2 (20.1); females were older than males (52.4 (SD 22.0) vs 44.1 (SD 18.9),  $p < 0.0001$ ). Females had less severe injury ( $p < 0.0001$ ). Mean (median for GCS) physiological variables were similar for females and males. Small differences in heart rate, respiratory rate and oxygen saturations demonstrated statistical but not clinically significant differences.

Of patients who survived to hospital, 3,868 (5.5%) died within 30 days of initial injury. Females had statistically worse survival although the difference was small (94.0% versus 94.6%,  $p = 0.001$ ). A higher proportion of females were trapped than males ( $p < 0.0001$ ). Of the population of patients who were trapped, females had better outcomes (92.3% alive at 30 days compared to 90.0% of males,  $p = 0.01$ ).

**Table 1: Demographics, outcomes and physiology**

|                                    | All Trapped and Not Trapped |                   |                   |             | Only Trapped     |                  |             |
|------------------------------------|-----------------------------|-------------------|-------------------|-------------|------------------|------------------|-------------|
|                                    | Total                       | Female            | Male              | P value     | Female           | Male             | P value     |
| Number (%)                         | 700<br>27                   | 181 (26.0<br>75 ) | 518 (74.0<br>52 ) | <0.00<br>01 | 287 (15.<br>9 8) | 487 (9.4<br>5 )  | <0.00<br>01 |
| Age (mean, SD)                     | 46.2 (20.1<br>)             | 52.4 (22.0<br>)   | 44.1 (18.9<br>)   | <0.00<br>01 | 50.1 (21.8<br>)  | 42.9 (19.7<br>)  | <0.00<br>01 |
| ISS (Median, IQR)                  | 13 (9-<br>22)               | 13 (9-<br>22)     | 13 (9-<br>24)     | <0.00<br>01 | 17 (9-<br>27)    | 19 (10-<br>29)   | <0.00<br>01 |
| Driver of vehicle                  | 166<br>00                   | 513 (30.9<br>2 )  | 114 (69.1<br>68 ) | <0.00<br>01 | 162 (31.9<br>3 ) | 347 (68.1<br>1 ) | <0.00<br>01 |
| Systolic Blood Pressure (mean, SD) | 133.3 (28.0<br>)            | 133.1 (30.2<br>)  | 133.4 (27.2<br>)  | 0.361       | 128.7 (30.7<br>) | 129.5 (30.9<br>) | 0.309       |
| Heart Rate (mean, SD)              | 86.7 (22.2<br>)             | 87.9 (21.9<br>)   | 86.2 (22.3<br>)   | <0.00<br>1  | 91.2 (24.2<br>)  | 92.1 (26.3<br>)  | 0.185       |
| Respiratory Rate (mean, SD)        | 20.3 (6.9)                  | 20.3 (6.7)        | 20.3 (7.0)        | 0.833       | 21.3 (7.3)       | 21.5 (8.2)       | 0.207       |
| Oxygen Saturation (mean, SD)       | 96.1 (7.9)                  | 96.2 (7.3)        | 96.0 (8.0)        | 0.001       | 97.4 (5.9)       | 97.3 (5.9)       | 0.544       |
| GCS ISS (Median, IQR)              | 15 (15-<br>15)              | 15 (15-<br>15)    | 15 (15-<br>15)    | n/a         | 15 (141<br>5)    | 15 (14-<br>15)   | n/a         |
| Alive at 30 days (n,%)             | 661 (94.5<br>59 )           | 170 (94.0<br>84 ) | 490 (94.6<br>75 ) | 0.001       | 265 (92.3<br>7 ) | 439 (90.0<br>6 ) | 0.01        |

Table 2 and 3 show that trapped females and males demonstrated significant differences in the incidence of thoracic and spinal injuries. Tension pneumothorax was more common in males and dens fractures were more common in females (both  $p < 0.0001$ ). Spinal cord injuries were also more common in females ( $p = 0.038$ ). In trapped patients, males were more likely to suffer from head, face, thoracic and limb injuries (all  $p < 0.0001$ , Table 3), while females were more likely to have pelvic ( $p < 0.0001$ ) and spinal injuries ( $p < 0.001$ ). The incidence of abdominal injuries was similar in females and males.

**Table 2: Significant and spinal injuries by sex for trapped casualties**

|                                           | Female | %    | Male | %    | P value |
|-------------------------------------------|--------|------|------|------|---------|
| Pelvic ring fracture with blood loss >20% | 23     | 0.8  | 48   | 1.0  | 0.394   |
| Blood loss>20% (%)                        | 114    | 4.0  | 161  | 3.3  | 0.139   |
| Tension pneumothorax (%)                  | 26     | 0.9  | 92   | 1.9  | <0.0001 |
| Multiple spinal fractures (%)             | 429    | 14.9 | 649  | 13.3 | 0.54    |
| Dens fracture (%)                         | 85     | 3.0  | 79   | 1.6  | <0.0001 |
| Spinal compression fracture grade 2/3 (%) | 66     | 2.3  | 75   | 1.5  | 0.022   |
| Unstable spinal fracture (%)              | 276    | 9.6  | 441  | 9.0  | 0.43    |
| Spinal cord injury (%)                    | 218    | 7.6  | 308  | 6.3  | 0.038   |

**Table 3: Injury site by sex for trapped casualties**

|                 | Female | %    | Male | %    | P value |
|-----------------|--------|------|------|------|---------|
| Head AIS 3+     | 578    | 20.1 | 1318 | 27.0 | <0.0001 |
| Face AIS 3+     | 6      | 0.2  | 46   | 0.9  | <0.0001 |
| Thoracic AIS 3+ | 1438   | 49.9 | 2721 | 55.8 | <0.0001 |
| Abdomen AIS 3+  | 355    | 12.3 | 595  | 12.2 | 0.87    |
| Spine AIS3+     | 359    | 12.5 | 485  | 9.9  | 0.001   |
| Pelvic AIS 3+   | 420    | 14.6 | 475  | 9.7  | <0.0001 |
| Limb AIS 3+     | 778    | 27.0 | 1744 | 35.8 | <0.0001 |

1  
2  
3 Figure 2 demonstrates the interaction between adjusted mortality, trapped status and age. This  
4 analysis adjusts for the interaction between age and sex, ISS, GCS and the Charlson comorbidity  
5 index. In this adjusted analysis, trapped male patients were more likely to die – but the 95%  
6 confidence intervals overlapped between the male and female groups for all age categories.  
7  
8  
9

10  
11 **Figure 2: Adjusted mortality and age**  
12 (Error bars = 95% Confidence Intervals)  
13  
14  
15  
16  
17

18  
19 Figure 3 displays the interaction between probability of entrapment, sex and age. Females were  
20 more likely to be trapped in all the age groups considered – except in patients aged 80 and over.  
21  
22  
23

24 **Figure 3: Probability of entrapment and age**  
25 (Error bars = 95% Confidence Intervals)  
26  
27  
28  
29  
30  
31  
32  
33  
34  
35  
36  
37  
38  
39  
40  
41  
42  
43  
44  
45  
46  
47  
48  
49  
50  
51  
52  
53  
54  
55  
56  
57  
58  
59  
60

## Discussion:

This is the largest analysis to date of sex-disaggregated data for trauma patients following an MVC and confirms significant differences in injury patterns and trapped status between females and males.

The explanations for these differences are likely to include both reasons pertaining to biological sex (e.g. physical size, muscle mass, hormonal differences) and reasons pertaining to gender (such as driving behaviours, post-collision behaviours, and responses by emergency responders such as decisions related to extrication).

### *Age, ISS, physiology and outcomes:*

Of patients in the analysis, females had a lower ISS and tended to be older than males. These differences were more apparent in those patients that were trapped. The recorded physiological observations are broadly similar between sexes.

However, there are gender-related differences that may contribute to the observed differences. Men drive more miles, faster, in a more risky manner and more frequently have accidents, resulting in the higher injury burden and mortality as seen in this analysis and elsewhere [10–13]. Women make up a higher proportion of older drivers [14]. Older females are more likely than men of equivalent age to be killed or seriously injured in collisions, after controlling for miles driven; whereas young men have the highest risk of serious injury or death per million miles driven [11].

### *Injuries in trapped casualties:*

Trapped males were more likely to have severe injuries of the head, face, chest (including tension pneumothorax) and limbs, with females more likely to have injuries of the vertebrae, spinal cord and pelvis. No statistically significant differences were found between trapped females and males in relation to pelvic ring injuries with blood loss, multiple spinal fractures or abdominal injuries.

Differences in injuries may be accounted for by i) differences in car usage, kinematics, and mechanism of injury (MOI), ii) differences in effectiveness and availability of safety systems and iii) differences in biological propensity to certain injury types.

- i) Difference in kinematics and resultant mechanism of injury. An analysis of the UK based STATS-19 MVC registry demonstrates that males are more likely to have MVCs whilst

1  
2  
3 travelling forwards (64.2% vs 56.5%) whereas females are more likely to have collisions  
4 whilst manoeuvring (16.1% vs 11.9%) or turning (10.7% vs 8.4%). Similar findings are  
5 reported in the United States, with females more likely to be involved in a side impact  
6 MVC and males more likely to have a frontal impact [15]. Side impact MVCs result in a  
7 transfer of energy to the patient that is more likely to cause significant spinal injury [16].  
8 Side impacts are also a common cause of lateral compression fractures of the pelvis  
9 [17,18] which may explain the finding of an increased prevalence of these injuries in  
10 females. It is rare for lateral compression fractures of the pelvis to be associated with  
11 significant bleeding which perhaps accounts for the higher rate of pelvic fractures in  
12 females but not a high rate of pelvic fractures with significant blood loss [19].

21 Males experience a higher rate of frontal collisions, which may account for the increased  
22 rate of head, face and chest injury found in this study ,through interactions and resultant  
23 energy transfer with the steering wheel and/or air bag [20,21]. The higher rate of male  
24 drivers and their interactions with the pedals and the “bracing” experienced by drivers  
25 pre-collision may explain the higher rate of limb injury seen in males in this study  
26 [22,23].

35 ii) Differences in availability and effectiveness of safety systems. Safety systems are less  
36 effective for passengers than drivers and are optimised to minimise energy transfer from  
37 frontal collisions [22,24,25].

41 iii) It has been previously demonstrated that women are more likely to be compliant  
42 with safety systems such as seat belts than men and as a result have less risk of multiple  
43 and severe injuries and their associated mortality [26,27]. However, the safety features  
44 incorporated in modern cars are less likely to be effective for women. Current  
45 mandatory crash testing uses a scaled-down 50th centile male mannequin to represent  
46 5<sup>th</sup> percentile females and are not modelled to account for anthropometric differences  
47 between females and males [28–31]. This systemic bias, with cars developed, tested and  
48 safety-rated using primarily an anatomically correct, weighted and biomechanical  
49 matched male mannequin has led to the development of safety systems which are likely  
50 to be more effective for males than females. For example, whiplash protection systems  
51 are significantly more effective at preventing injury in men than women [29,32].  
52  
53  
54  
55  
56  
57  
58  
59  
60



1  
2  
3 Comparison of female and male dummies demonstrates higher biomechanical response  
4 in the female dummy in the neck region which may offer some explanation for the  
5 increased rate of spinal fractures in females found in our study [33].  
6  
7  
8  
9

10 Moreover, females are more likely to drive and be injured in smaller cars, with less  
11 efficient safety systems. Smaller cars are associated with a greater injury burden and  
12 may account for some of the sex-related differences seen in this study [34].  
13  
14  
15

16  
17 iii) Females are biologically prone to certain injury types.

18 The intersection of age, biological differences, female propensity to injury and medical  
19 conditions such as osteoporosis may further account for some of the differences in  
20 injuries seen in this analysis [35]. Females and males differ physically in ways which are  
21 pertinent to injury and entrapment in RTCs. They each have unique anthropometry for  
22 example: females have wider pelvic measurements and shorter torsos, even controlled  
23 for height difference [36]. As such, female pelvic geometry may be more prone to injury  
24 following a side impact [37]. A combination of these factors may explain the differences  
25 seen in injury patterns in this study; we found a greater proportion of pelvic fractures in  
26 females, and a higher rate of head and chest injury in males.  
27  
28  
29  
30  
31  
32  
33  
34

35 Sex hormones affect body composition. Testosterone contributes significantly greater  
36 skeletal muscle mass (8% greater, after correcting for BMI) in males, which does not  
37 start to fall until the fifth decade [38]. Female sex hormones are responsible for  
38 ligaments in females being more lax, which combined with females' cervical vertebrae  
39 being smaller than males of equivalent head size, may explain the greater rate of spinal  
40 cord injury in females [39,40]. Post-menopausal changes in bone composition mean that  
41 females have a 50% greater loss of bone in old age compared to males, again making  
42 them susceptible to fractures as a result of MVC [35].  
43  
44  
45  
46  
47  
48  
49

50 *Trapped status and death:*

51 Females were more likely than men to be trapped (15.8 vs 9.4%,  $p < 0.0001$ ). The mean age of  
52 trapped females was significantly higher than trapped males; this may influence their own ability to  
53 self-extricate due to frailty or relative immobility[41]. An additional possible explanation may include  
54 different treatment by rescuers, for example, perhaps being less likely to recommend or facilitate  
55 self-extrication for older females. Females are more likely to sit closer to the steering wheel,  
56  
57  
58  
59  
60

1  
2  
3 meaning that less movement intrusion of the dashboard and steering wheel is required to cause  
4 entrapment [42]. Furthermore, this study found that females are more likely to have injuries of the  
5 pelvis and spine and these injuries may prevent self-extrication and increase the frequency of  
6 entrapment.  
7  
8  
9

10  
11 Post-collision behaviour and patient experience differences between females and males may  
12 contribute to the increased rate of entrapment in females, who are more likely to experience multi-  
13 region and widespread pain following a MVC, which may prevent them leaving the vehicle without  
14 assistance [43]. TARN does not record whether a patient was physically trapped by vehicle  
15 deformation or medically trapped (e.g. by pain) which prevents further analysis within this dataset.  
16  
17  
18  
19

20  
21 Trapped females had a lower ISS than trapped males and were less likely to die (7.7% vs 10.0%).  
22 However, once the factors in our model were considered (age, sex, ISS, GCS and Charlson co-  
23 morbidity index) no difference in mortality was found between females and males (Figure 2).  
24  
25  
26

#### 27 *Clinical and operational implications:*

28  
29 This study shows that men and women experience different rates of entrapment and different injury  
30 patterns when involved in MVCs. This may have implications for the design of car safety systems, so  
31 as to protect men and women equally. Likewise, for prehospital clinicians, this work highlights the  
32 differences seen in clinical practice when attending MVCs.  
33  
34  
35  
36

37  
38 This study was unable to distinguish entrapment due to medical causes (e.g. pain or relative  
39 immobility) from physical entrapment due to vehicle deformity, which implies a greater energy  
40 transfer collision. The higher rate of female entrapment seen may in part be explained by this  
41 cohort being older and having greater co-morbidity. Current UK extrication dogma still prioritises  
42 'spinal precaution' methods of extrication that involve the patient being passive in the process. A  
43 greater focus on self-extrication as a safe alternative to rescue service assisted extrication may in  
44 future reduce the number of medically trapped patients.  
45  
46  
47  
48  
49

#### 50 *Limitations:*

51  
52 Not all patients trapped in a MVC were included in this study due to the TARN inclusion criteria. Of  
53 note, pre-hospital deaths from the most severe MVCs are not included, nor were patients who  
54 received minor injuries but physically trapped by mechanical deformation of the vehicle. This  
55 analysis did not discriminate between the type of vehicle (e.g. car or bus/coach or light/heavy goods  
56 vehicle) and includes all occupants of vehicles involved in a motor vehicle collision which is a  
57  
58  
59  
60

1  
2  
3 heterogenous group. The “trapped” status recorded on TARN has poor data completeness, the  
4 definition is open to interpretation and cannot distinguish between type and mode of entrapment.  
5 These limitations may hinder our interpretation of trapped status.  
6  
7  
8  
9

10 **Conclusions:**

11 More males are more severely injured and die as a result of MVC than females. Females under 80  
12 are more frequently trapped than males. Females are more likely to have spinal and pelvic injuries  
13 and males are more likely to have head, face, thoracic and limb injuries. Differences in driving  
14 behaviours, kinematics, collision type, position in vehicle, the efficacy of safety systems, biological  
15 vulnerability to certain injury types and post-injury behaviour may all have influence on these  
16 patterns.  
17  
18  
19  
20  
21  
22

23 Sex-disaggregated data on mortality, entrapment and injury patterns in motor-vehicle collisions may  
24 help to inform vehicle manufacturers, emergency services personnel and road-safety organisations  
25 to tailor responses with the aim of equitable outcomes by targeting equal performance of safety  
26 measures and reducing excessive risk to one sex or gender. Future work should include appropriate  
27 sex and gender-based analysis designed to shed light on the biological and sociocultural factors that  
28 creates differential experience and outcome for women and men.  
29  
30  
31  
32  
33  
34  
35  
36  
37  
38  
39  
40  
41  
42  
43  
44  
45  
46  
47  
48  
49  
50  
51  
52  
53  
54  
55  
56  
57  
58  
59  
60

## Declarations

### Ethics approval and consent to participate

TARN data analyses are conducted using anonymised data which is governed by a code of practice approved by the Confidentiality Advisory Group who are appointed by the Health Research Authority. Additional individual ethical approval was not required for this analysis.

### Consent for publication

Not applicable.

### Availability of data and materials

The datasets used and/or analysed during the current study are available from the corresponding author on reasonable request.

### Competing interests

The authors declare that they have no competing interests

### Funding

Publication costs were funded by a charitable grant from the Road Safety Trust. The Road Safety Trust had no role in the design, data collection, analysis or writing of this manuscript.

### Authors' contributions

TN, LW, SH, RF, JS and WS contributed to the conception and study design, analysis and interpretation of data, drafting and revising the manuscript. OB contributed to the analysis and interpretation of the data and critically revised the manuscript. All authors read and approved the final manuscript.

### Acknowledgements

1  
2  
3 We would like to thank TARN and the TARN research committee for their support. Thank  
4  
5 you to Caroline Leech who provided feedback on an early draft of the manuscript.  
6  
7  
8

9 **Authors' information (optional)**  
10

11  
12  
13 Not applicable.  
14  
15  
16  
17  
18  
19  
20  
21  
22  
23  
24  
25  
26  
27  
28  
29  
30  
31  
32  
33  
34  
35  
36  
37  
38  
39  
40  
41  
42  
43  
44  
45  
46  
47  
48  
49  
50  
51  
52  
53  
54  
55  
56  
57  
58  
59  
60

For peer review only

**References:**

- 1 Heidari S, Bachelet VC. Sex and gender analysis for better science and health equity. *Lancet* 2018;392:1500–2. doi:10.1016/s0140-6736(18)32619-9
- 2 Outcome NCE into P, NCEPOD D. Trauma: Who Cares? *NCEPOD* 2007;;:1–151. www.ncepod.org.uk.
- 3 Kehoe A, Smith JE, Edwards A, *et al.* The changing face of major trauma in the UK. *Emerg Medicine J Emj* 2015;32:911–5. doi:10.1136/emmermed-2015-205265
- 4 TARN. Major Trauma in Older People. Published Online First: 2017. <https://www.tarn.ac.uk/content/downloads/3793/Major%20Trauma%20in%20Older%20People%202017.pdf>
- 5 WHO. Global status report on road safety 2015. Published Online First: 2015. <https://apps.who.int/iris/handle/10665/189242>
- 6 Avery E, Clark J. Sex-related reporting in randomised controlled trials in medical journals. *Lancet* 2016;388:2839–40. doi:10.1016/s0140-6736(16)32393-5
- 7 Wu J, Gale CP, Hall M, *et al.* Editor's Choice - Impact of initial hospital diagnosis on mortality for acute myocardial infarction: A national cohort study. *European Hear J Acute Cardiovasc Care* 2016;7:139–48. doi:10.1177/2048872616661693
- 8 Nutbeam T, Fenwick R, Smith J, *et al.* A comparison of the demographics, injury patterns and outcome data for patients injured in motor vehicle collisions who are trapped compared to those patients who are not trapped. *Scand J Trauma Resusc Emerg Medicine* 2021;29:17. doi:10.1186/s13049-020-00818-6
- 9 Fenwick R, Nutbeam T. Medical vs. true physical traffic collision entrapment. *J Paramedic Pract* 2018;10:158–62. doi:10.12968/jpar.2018.10.4.158
- 10 Al-Balbissi AH. Role of Gender in Road Accidents. *Traffic Inj Prev* 2003;4:64–73. doi:10.1080/15389580309857
- 11 Massie DL, Green PE, Campbell KL. Crash involvement rates by driver gender and the role of average annual mileage. *Accid Analysis Prev* 1997;29:675–85. doi:10.1016/s0001-4575(97)00037-7
- 12 Tamás V, Kocsor F, Gyuris P, *et al.* The Young Male Syndrome—An Analysis of Sex, Age, Risk Taking and Mortality in Patients With Severe Traumatic Brain Injuries. *Front Neurol* 2019;10:366. doi:10.3389/fneur.2019.00366
- 13 WHO. Gender and Road Traffic Injuries. *Gender and Health* 2002.
- 14 Transport D of. Reported road casualties in Great Britain: provisional results 2019. 2020. [https://assets.publishing.service.gov.uk/government/uploads/system/uploads/attachment\\_data/file/904698/rrcgb-provisional-results-2019.pdf](https://assets.publishing.service.gov.uk/government/uploads/system/uploads/attachment_data/file/904698/rrcgb-provisional-results-2019.pdf)

- 1  
2  
3 15 Bose D, ScD MS-G, Crandall JR. Vulnerability of Female Drivers Involved in Motor Vehicle Crashes:  
4 An Analysis of US Population at Risk. *Am J Public Health* 2011;101:2368–73.  
5 doi:10.2105/ajph.2011.300275  
6
- 7 16 Maak TG, Ivancic PC, Tominaga Y, *et al.* Side Impact Causes Multiplanar Cervical Spine Injuries. *J*  
8 *Trauma Inj Infect Critical Care* 2007;63:1296–307. doi:10.1097/01.ta.0000241237.72420.51  
9
- 10 17 Coccolini F, Stahel PF, Montori G, *et al.* Pelvic trauma: WSES classification and guidelines. *World J*  
11 *Emerg Surg Wjes* 2017;12:5. doi:10.1186/s13017-017-0117-6  
12
- 13 18 Scott I, Porter K, Laird C, *et al.* The prehospital management of pelvic fractures: initial consensus  
14 statement. *Emerg Med J* 2013;30:1070. doi:10.1136/emered-2013-203211  
15
- 16 19 Magnussen RA, Tressler MA, Obremskey WT, *et al.* Predicting Blood Loss in Isolated Pelvic and  
17 Acetabular High-Energy Trauma. *J Orthop Trauma* 2007;21:603–7.  
18 doi:10.1097/bot.0b013e3181599c27  
19
- 20 20 Fadl SA, Sandstrom CK. Pattern Recognition: A Mechanism-based Approach to Injury Detection  
21 after Motor Vehicle Collisions. *Radiographics* 2019;39:857–76. doi:10.1148/rg.2019180063  
22
- 23 21 . Gloyns PF, Rattenbury SJ, Rivlin AZ, *et al.* Steering Wheel Induced Head and Facial Injuries  
24 Amongst Drivers Restrained by Seat Belts. *Accident Research Unit, Department of Transportation*  
25
- 26 22 Bose D, Crandall JR. Influence of Active Muscle Contribution on the Injury Response of Restrained  
27 Car Occupants. *Annals of Advances in Automotive Medicine* 2008.  
28
- 29 23 Neale M, Thomas R, Bateman H, *et al.* A FINITE ELEMENT MODELLING INVESTIGATION OF LOWER  
30 LEG INJURIES. In: *20th International Technical Conference on the Enhanced Safety of Vehicles*. 2007.  
31 <http://www-nrd.nhtsa.dot.gov/departments/esv/20th/>  
32
- 33 24 Daskal Y, Alfici R, Givon A, *et al.* Evaluation of differences in injury patterns according to seat  
34 position in trauma victims survived traffic accidents. *Chin J Traumatology* 2018;21:273–6.  
35 doi:10.1016/j.cjtee.2018.03.001  
36
- 37 25 Pedley DK, Thakore S. Difference in injury pattern between drivers and front seat passengers  
38 involved in road traffic accidents in Scotland. *Emerg Med J* 2004;21:197.  
39 doi:10.1136/emj.2003.012369  
40
- 41 26 Schermer CR, Omi EC, Ton-That H, *et al.* A Clustering of Injury Behaviors. *J Trauma Inj Infect*  
42 *Critical Care* 2008;65:1000–4. doi:10.1097/ta.0b013e318182f76b  
43
- 44 27 Febres JD, García-Herrero S, Herrera S, *et al.* Influence of seat-belt use on the severity of injury in  
45 traffic accidents. *Eur Transp Res Rev* 2020;12:9. doi:10.1186/s12544-020-0401-5  
46
- 47 28 Linder A, Svedberg W. Review of average sized male and female occupant models in European  
48 regulatory safety assessment tests and European laws: Gaps and bridging suggestions. *Accid Analysis*  
49 *Prev* 2019;127:156–62. doi:10.1016/j.aap.2019.02.030  
50
- 51 29 Carlsson A, Chang F, Lemmen P, *et al.* Anthropometric Specifications, Development, and  
52 Evaluation of EvaRID—A 50th Percentile Female Rear Impact Finite Element Dummy Model. *Traffic*  
53 *Inj Prev* 2014;15:855–65. doi:10.1080/15389588.2014.885647  
54  
55  
56  
57  
58  
59  
60

1  
2  
3 30 Carlsson A, Linder A, Davidsson J, *et al.* Dynamic Kinematic Responses of Female Volunteers in  
4 Rear Impacts and Comparison to Previous Male Volunteer Tests. *Traffic Inj Prev* 2011;12:347–57.  
5 doi:10.1080/15389588.2011.585408  
6

7  
8 31 Linder A, Svensson MY. Road safety: the average male as a norm in vehicle occupant crash safety  
9 assessment. *Interdiscipl Sci Rev* 2019;44:140–53. doi:10.1080/03080188.2019.1603870  
10

11 32 Viano DC. Seat Influences on Female Neck Responses in Rear Crashes: A Reason Why Women  
12 Have Higher Whiplash Rates. *Traffic Inj Prev* 2003;4:228–39. doi:10.1080/15389580309880  
13

14 33 Parenteau CS, Zuby D, Karin B, Brolin, *et al.* Restrained Male and Female Occupants in Frontal  
15 Crashes: Are We Different? *IRCOBI Conference 2013* 2013.  
16

17  
18 34 Brumbelow ML, Jermakian JS. Injury risks and crashworthiness benefits for females and males:  
19 Which differences are physiological? *Traffic Inj Prev* 2021;:1–6.  
20 doi:10.1080/15389588.2021.2004312  
21

22 35 O'Neill T. The Relationship Between Bone Density and Incident Vertebral Fracture in Men and  
23 Women. *J Bone Miner Res* 2002;17:2214–21. doi:10.1359/jbmr.2002.17.12.2214  
24

25 36 Fullenkamp AM. Gender Differences in NATO Anthropometry and the Implication for Protective  
26 Equipment. 2008.  
27

28  
29 37 Klein KF, Reed MP, Rupp JD. Development of Geometric Specifications for a Small Female  
30 Anthropomorphic Test Device Pelvis. *The University of Michigan Transportation Research Institute*  
31 2016.  
32

33 38 Janssen I, Heymsfield SB, Wang Z, *et al.* Skeletal muscle mass and distribution in 468 men and  
34 women aged 18–88 yr. *J Appl Physiol* 2000;89:81–8. doi:10.1152/jappl.2000.89.1.81  
35

36 39 Shultz SJ, Sander TC, Kirk SE, *et al.* Sex differences in knee joint laxity change across the female  
37 menstrual cycle. *J Sports Medicine Phys Fit* 2005;45:594–603.  
38

39 40 Stemper BD, Yoganandan N, Pintar FA, *et al.* Anatomical Gender Differences in Cervical Vertebrae  
40 of Size-Matched Volunteers. *Spine* 2008;33:E44–9. doi:10.1097/brs.0b013e318160462a  
41

42 41 Nutbeam T, Kehoe A, Fenwick R, *et al.* Do Entrapment, Injuries, Outcomes and Potential for Self-  
43 extrication Vary with Age? A Pre-specified Analysis of the UK Trauma Registry (TARN). Published  
44 Online First: 2021. doi:10.21203/rs.3.rs-1076806/v1  
45

46 42 McFadden M, Powers J, Brown W, *et al.* Vehicle and Driver Attributes Affecting Distance from the  
47 Steering Wheel in Motor Vehicles. *Hum Factors J Hum Factors Ergonomics Soc* 2000;42:676–82.  
48 doi:10.1518/001872000779697971  
49

50 43 Beaudoin FL, Kessler RC, Hwang I, *et al.* Pain after a motor vehicle crash: The role of  
51 socio-demographics, crash characteristics and peri-traumatic stress symptoms. *Eur J Pain*  
52 2021;25:1119–36. doi:10.1002/ejp.1733  
53  
54  
55  
56  
57  
58  
59  
60



1  
2  
3 **Figures and tables legend:**  
4  
5  
6

7 Figure 1: Strobe Diagram

8 Figure 2: Adjusted mortality and age  
9 (Error bars = 95% Confidence Intervals)  
10

11 Figure 3: Probability of entrapment and age  
12 (Error bars = 95% Confidence Intervals)  
13  
14

15  
16 Table 1: Demographics, outcomes and physiology

17 Table 2: Significant and spinal injuries by sex for trapped casualties

18 Table 3: Injury site by sex for trapped casualties  
19  
20  
21  
22  
23  
24  
25  
26  
27  
28  
29  
30  
31  
32  
33  
34  
35  
36  
37  
38  
39  
40  
41  
42  
43  
44  
45  
46  
47  
48  
49  
50  
51  
52  
53  
54  
55  
56  
57  
58  
59  
60

Total patients recorded  
England 2012 - 2019  
**450,437**

Known outcome  
**433,836**

Direct Admission  
**407,465**

Age  $\geq 16$   
**391,035**

Vehicle incident/collision  
**71,719**

Not Trapped  
**62,273**

Unknown Trapping status  
**1,692**

Trapped  
**7,754**

1  
2  
3  
4  
5  
6  
7  
8  
9  
10  
11  
12  
13  
14  
15  
16  
17  
18  
19  
20  
21  
22  
23  
24  
25  
26  
27  
28  
29  
30  
31  
32  
33  
34  
35  
36  
37  
38  
39  
40  
41

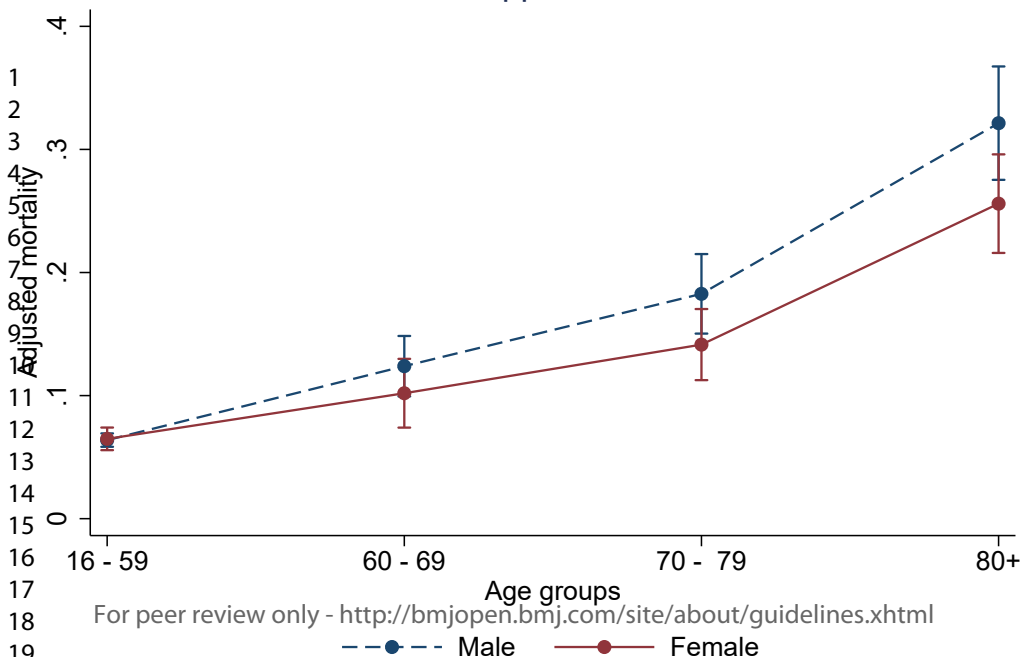

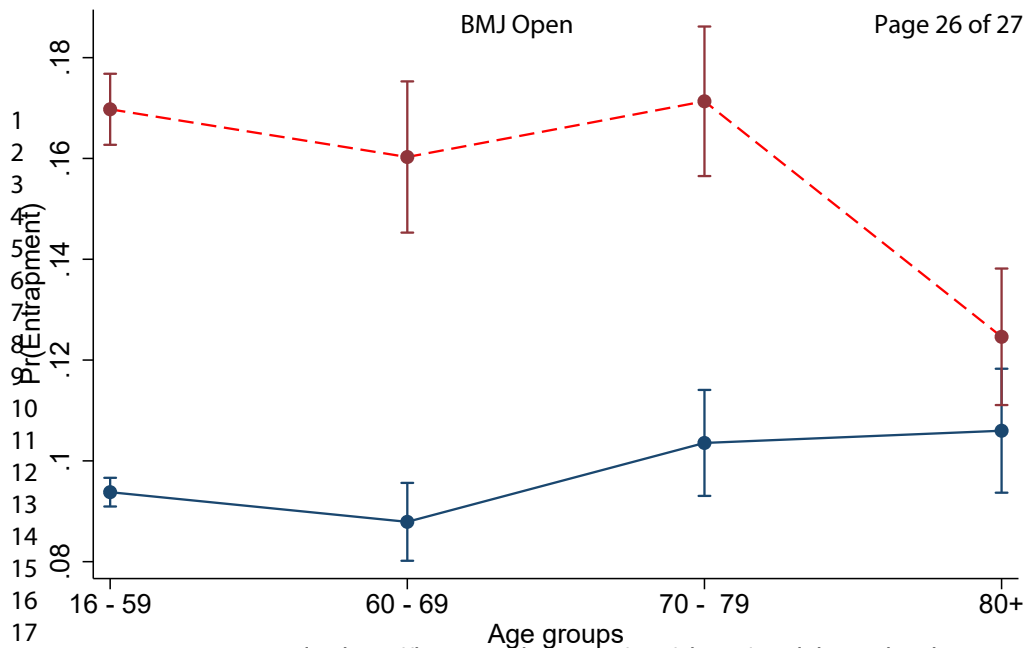

For peer review only - <http://bmjopen.bmj.com/site/about/guidelines.xhtml>

Male Female

STROBE Statement—Checklist of items that should be included in reports of *cohort studies*

|                              | Item No | Recommendation                                                                                                                                                                                                                                                                                                         | Page No |
|------------------------------|---------|------------------------------------------------------------------------------------------------------------------------------------------------------------------------------------------------------------------------------------------------------------------------------------------------------------------------|---------|
| <b>Title and abstract</b>    | 1       | (a) Indicate the study's design with a commonly used term in the title or the abstract<br>(b) Provide in the abstract an informative and balanced summary of what was done and what was found                                                                                                                          | 1       |
| <b>Introduction</b>          |         |                                                                                                                                                                                                                                                                                                                        |         |
| Background/rationale         | 2       | Explain the scientific background and rationale for the investigation being reported                                                                                                                                                                                                                                   | 5       |
| Objectives                   | 3       | State specific objectives, including any prespecified hypotheses                                                                                                                                                                                                                                                       | 6       |
| <b>Methods</b>               |         |                                                                                                                                                                                                                                                                                                                        |         |
| Study design                 | 4       | Present key elements of study design early in the paper                                                                                                                                                                                                                                                                | 7       |
| Setting                      | 5       | Describe the setting, locations, and relevant dates, including periods of recruitment, exposure, follow-up, and data collection                                                                                                                                                                                        | 7       |
| Participants                 | 6       | (a) Give the eligibility criteria, and the sources and methods of selection of participants. Describe methods of follow-up<br>(b) For matched studies, give matching criteria and number of exposed and unexposed                                                                                                      | 7       |
| Variables                    | 7       | Clearly define all outcomes, exposures, predictors, potential confounders, and effect modifiers. Give diagnostic criteria, if applicable                                                                                                                                                                               | 7       |
| Data sources/<br>measurement | 8*      | For each variable of interest, give sources of data and details of methods of assessment (measurement). Describe comparability of assessment methods if there is more than one group                                                                                                                                   | 7       |
| Bias                         | 9       | Describe any efforts to address potential sources of bias                                                                                                                                                                                                                                                              | 7       |
| Study size                   | 10      | Explain how the study size was arrived at                                                                                                                                                                                                                                                                              |         |
| Quantitative variables       | 11      | Explain how quantitative variables were handled in the analyses. If applicable, describe which groupings were chosen and why                                                                                                                                                                                           | 7       |
| Statistical methods          | 12      | (a) Describe all statistical methods, including those used to control for confounding<br>(b) Describe any methods used to examine subgroups and interactions<br>(c) Explain how missing data were addressed<br>(d) If applicable, explain how loss to follow-up was addressed<br>(e) Describe any sensitivity analyses | 7       |
| <b>Results</b>               |         |                                                                                                                                                                                                                                                                                                                        |         |
| Participants                 | 13*     | (a) Report numbers of individuals at each stage of study—eg numbers potentially eligible, examined for eligibility, confirmed eligible, included in the study, completing follow-up, and analysed<br>(b) Give reasons for non-participation at each stage<br>(c) Consider use of a flow diagram                        | 8       |
| Descriptive data             | 14*     | (a) Give characteristics of study participants (eg demographic, clinical, social) and information on exposures and potential confounders<br>(b) Indicate number of participants with missing data for each variable of interest<br>(c) Summarise follow-up time (eg, average and total amount)                         | 8/9     |
| Outcome data                 | 15*     | Report numbers of outcome events or summary measures over time                                                                                                                                                                                                                                                         | 9/10    |

|    |                          |    |                                                                                                                                                                                                              |       |
|----|--------------------------|----|--------------------------------------------------------------------------------------------------------------------------------------------------------------------------------------------------------------|-------|
| 1  | Main results             | 16 | (a) Give unadjusted estimates and, if applicable, confounder-adjusted estimates and their precision (eg, 95% confidence interval). Make clear which confounders were adjusted for and why they were included | 9/10  |
| 2  |                          |    | (b) Report category boundaries when continuous variables were categorized                                                                                                                                    |       |
| 3  |                          |    | (c) If relevant, consider translating estimates of relative risk into absolute risk for a meaningful time period                                                                                             |       |
| 4  |                          |    |                                                                                                                                                                                                              |       |
| 5  | Other analyses           | 17 | Report other analyses done—eg analyses of subgroups and interactions, and sensitivity analyses                                                                                                               | 11/12 |
| 6  | <b>Discussion</b>        |    |                                                                                                                                                                                                              |       |
| 7  | Key results              | 18 | Summarise key results with reference to study objectives                                                                                                                                                     | 13    |
| 8  | Limitations              | 19 | Discuss limitations of the study, taking into account sources of potential bias or imprecision. Discuss both direction and magnitude of any potential bias                                                   | 16    |
| 9  | Interpretation           | 20 | Give a cautious overall interpretation of results considering objectives, limitations, multiplicity of analyses, results from similar studies, and other relevant evidence                                   | 13    |
| 10 | Generalisability         | 21 | Discuss the generalisability (external validity) of the study results                                                                                                                                        | 13    |
| 11 | <b>Other information</b> |    |                                                                                                                                                                                                              |       |
| 12 | Funding                  | 22 | Give the source of funding and the role of the funders for the present study and, if applicable, for the original study on which the present article is based                                                | 17    |

\*Give information separately for exposed and unexposed groups.

**Note:** An Explanation and Elaboration article discusses each checklist item and gives methodological background and published examples of transparent reporting. The STROBE checklist is best used in conjunction with this article (freely available on the Web sites of PLoS Medicine at <http://www.plosmedicine.org/>, Annals of Internal Medicine at <http://www.annals.org/>, and Epidemiology at <http://www.epidem.com/>). Information on the STROBE Initiative is available at <http://www.strobe-statement.org>.

# BMJ Open

## Sex-disaggregated analysis of the injury patterns, outcome data and trapped status of major trauma patients injured in motor vehicle collisions: a pre-specified analysis of the UK trauma registry (TARN)

|                                 |                                                                                                                                                                                                                                                                                                                                                                                                                                                                                                                                                                                                           |
|---------------------------------|-----------------------------------------------------------------------------------------------------------------------------------------------------------------------------------------------------------------------------------------------------------------------------------------------------------------------------------------------------------------------------------------------------------------------------------------------------------------------------------------------------------------------------------------------------------------------------------------------------------|
| Journal:                        | <i>BMJ Open</i>                                                                                                                                                                                                                                                                                                                                                                                                                                                                                                                                                                                           |
| Manuscript ID                   | bmjopen-2022-061076.R1                                                                                                                                                                                                                                                                                                                                                                                                                                                                                                                                                                                    |
| Article Type:                   | Original research                                                                                                                                                                                                                                                                                                                                                                                                                                                                                                                                                                                         |
| Date Submitted by the Author:   | 04-Apr-2022                                                                                                                                                                                                                                                                                                                                                                                                                                                                                                                                                                                               |
| Complete List of Authors:       | Nutbeam, Tim; Plymouth Hospitals NHS Foundation Trust, ; Devon Air Ambulance ,<br>Weekes, Lauren; University Hospitals Plymouth NHS Trust, Department of Anaesthesia<br>Heidari, Shirin; GENDRO<br>Fenwick, Rob; University Hospitals Birmingham NHS Foundation Trust<br>Bouamra, Omar; Trauma Audit & Research Network, Institute of Population Health<br>Smith, Jason; University Hospitals Plymouth NHS Trust, Emergency Department; Royal Centre for Defence Medicine, Academic Department of Military Emergency Medicine<br>Stassen, Willem; University of Cape Town, Division of Emergency Medicine |
| <b>Primary Subject Heading</b>: | Emergency medicine                                                                                                                                                                                                                                                                                                                                                                                                                                                                                                                                                                                        |
| Secondary Subject Heading:      | Emergency medicine                                                                                                                                                                                                                                                                                                                                                                                                                                                                                                                                                                                        |
| Keywords:                       | ACCIDENT & EMERGENCY MEDICINE, TRAUMA MANAGEMENT, Protocols & guidelines < HEALTH SERVICES ADMINISTRATION & MANAGEMENT                                                                                                                                                                                                                                                                                                                                                                                                                                                                                    |
|                                 |                                                                                                                                                                                                                                                                                                                                                                                                                                                                                                                                                                                                           |

SCHOLARONE™  
Manuscripts



I, the Submitting Author has the right to grant and does grant on behalf of all authors of the Work (as defined in the below author licence), an exclusive licence and/or a non-exclusive licence for contributions from authors who are: i) UK Crown employees; ii) where BMJ has agreed a CC-BY licence shall apply, and/or iii) in accordance with the terms applicable for US Federal Government officers or employees acting as part of their official duties; on a worldwide, perpetual, irrevocable, royalty-free basis to BMJ Publishing Group Ltd ("BMJ") its licensees and where the relevant Journal is co-owned by BMJ to the co-owners of the Journal, to publish the Work in this journal and any other BMJ products and to exploit all rights, as set out in our [licence](#).

The Submitting Author accepts and understands that any supply made under these terms is made by BMJ to the Submitting Author unless you are acting as an employee on behalf of your employer or a postgraduate student of an affiliated institution which is paying any applicable article publishing charge ("APC") for Open Access articles. Where the Submitting Author wishes to make the Work available on an Open Access basis (and intends to pay the relevant APC), the terms of reuse of such Open Access shall be governed by a Creative Commons licence – details of these licences and which [Creative Commons](#) licence will apply to this Work are set out in our licence referred to above.

Other than as permitted in any relevant BMJ Author's Self Archiving Policies, I confirm this Work has not been accepted for publication elsewhere, is not being considered for publication elsewhere and does not duplicate material already published. I confirm all authors consent to publication of this Work and authorise the granting of this licence.



1  
2  
3 **Sex-disaggregated analysis of the injury patterns, outcome data and trapped status of major**  
4 **trauma patients injured in motor vehicle collisions: a pre-specified analysis of the UK trauma**  
5 **registry (TARN)**  
6  
7  
8

9 Tim Nutbeam, Lauren Weekes, Shirin Heidari, Rob Fenwick, Omar Bouamra, Jason Smith, Willem  
10 Stassen  
11  
12  
13  
14  
15

- 16 1) Tim Nutbeam, Emergency Department, University Hospitals Plymouth NHS Trust, Plymouth,  
17 UK. Devon Air Ambulance Trust, UK, Division of Emergency Medicine, University of Cape  
18 Town, Cape Town, South Africa [timnutbeam@nhs.net](mailto:timnutbeam@nhs.net), @timnutbeam (corresponding  
19 author).  
20  
21  
22  
23  
24  
25 2) Lauren Weekes, Department of Anaesthesia, University Hospitals Plymouth NHS Trust,  
26 Plymouth, UK. Devon Air Ambulance Trust, UK.  
27  
28  
29 3) Shirin Heidari, Founder and President, GENDRO, Switzerland  
30  
31  
32 4) Rob Fenwick, University Hospitals Birmingham, UK.  
33  
34 5) Omar Bouamra, Trauma Audit Research Network, University of Manchester, Manchester,  
35 UK.  
36  
37  
38 6) Jason Smith, University Hospitals Plymouth NHS Trust, Plymouth, UK.  
39  
40  
41 7) Willem Stassen, Division of Emergency Medicine, University of Cape Town, Cape Town,  
42 South Africa  
43  
44  
45  
46  
47  
48  
49  
50  
51  
52  
53  
54  
55  
56  
57  
58  
59  
60

## Abstract

**Objectives:** To identify the differences between women and men in the probability of entrapment, frequency of injury, and outcomes following a motor vehicle collision. Publishing sex-disaggregated data, understanding differential patterns and exploring the reasons for these will assist with ensuring equity of outcomes especially in respect to triage, rescue and treatment of all patients.

**Design:** We examined data from the Trauma Audit Research Network (TARN) registry to explore sex differences in entrapment, injuries and outcomes. We explored the relationship between age, sex and trapped status using multivariate logistical regression.

**Setting:** TARN is a UK-based trauma registry covering England and Wales.

**Participants:** We examined data for 450,357 patients submitted to TARN during the study period (2012-2019) of which 70 027 met the inclusion criteria. There were 18,175 (26%) female and 51,852 (74%) male patients.

**Primary and secondary outcome measures:** We report difference in entrapment status, injury and outcome between female and male patients. For trapped patients we examined the effect of sex and age on death from any cause.

**Results:** Female patients were more frequently trapped than male patients (female [F] 15.8%, male [M] 9.4%;,  $p < 0.0001$ ). Trapped male patients more frequently suffered head (M 1318 [27.0%], F 578 [20.1%]), face, (M 46 [0.9%], F 6 [0.2%]), thoracic (M 2721 [55.8%], F 1438 [49.9%]), and limb injuries (M 1744 [35.8%], F 778 [27.0%]; all  $p < 0.0001$ ). Female patients had more injuries to the pelvis (F 420 [14.6%], M 475 [9.7%];  $p < 0.0001$ ) and spine (F 359 [12.5%], M 485 [9.9%];  $p = 0.001$ ). Following adjustment for the interaction between age and sex, ISS, GCS and the Charlson Comorbidity Index, no difference in mortality was found between female and male patients.

**Conclusions:** There are significant differences between female and male patients in the frequency at which patients are trapped and the injuries these patients sustain. This sex-disaggregated data may help vehicle manufacturers, road safety organisations and emergency services to tailor responses with the aim of equitable outcomes by targeting equal performance of safety measures and reducing excessive risk to one sex or gender.

1  
2  
3 **Keywords:** Extrication; Sex; Gender; Motor Vehicle Collision; Accidents, traffic; Spinal injuries; Pre-  
4 hospital care; Emergency Medical Services  
5  
6  
7

8  
9 **Strengths and limitations of this study**

- 10  
11 - We include data from 70,027 patients over an 8-year time period.  
12  
13 - The source dataset, the Trauma Audit and Research Network (TARN), is of high  
14 quality.  
15  
16 - The dataset does not allow clear differentiation between patients that are 'medically  
17 trapped' (e.g., due to pain) or 'physically trapped' (e.g. due to intrusion into the  
18 vehicle).  
19  
20 - We pre-specified outcome measures to minimise bias but the inherent concerns of a  
21 retrospective cohort analysis remain.  
22  
23 - Our analysis only includes patients who met the threshold for inclusion in TARN;  
24 therefore, motor vehicle collisions where severe injury did not occur were not  
25 included.  
26  
27  
28  
29  
30  
31  
32  
33  
34  
35

36  
37 **Introduction**

38 Sex refers to the biological attributes of humans and animals associated with physical and  
39 physiological characteristics such as reproductive anatomy, gene expression, chromosomes and  
40 hormone profiles. It is usually categorized as male or female, although there are other variations in  
41 sex characteristics [1].  
42  
43  
44

45 Gender refers to the societal overlay of roles, behaviours and identities ascribed to individuals. It  
46 influences how people see themselves, how they are perceived by others; societal bias affects  
47 distribution of power and resources. Gender identity refers to individual's deeply felt internal and  
48 individual experience of gender. Gender identity is a spectrum and are not restricted to man and  
49 woman. An individual's gender identity may differ from their sex assigned at birth [1].  
50  
51  
52  
53  
54

55 Research outcomes may depend on patient sex (such as medication trials, where sex hormones may  
56 affect efficacy), gender (e.g., in trials where actual or perceived behavioural differences may be  
57  
58  
59  
60

1  
2  
3 important) or both. The Trauma Audit and Research Network (TARN) dataset includes sex as  
4 recorded on the hospital notes and may represent either sex assigned at birth or gender.  
5  
6  
7

8 Historical epidemiological data describes major trauma secondary to injury in the UK as  
9 predominantly a disease of young men [2]. More recent analysis demonstrates that this paradigm no  
10 longer applies, with particular focus on the burden of trauma in the older population [3,4]. Despite  
11 increasing awareness of these changing demographics, trauma systems remain tuned to recognising  
12 and treating historical perceived norms [4,5].  
13  
14  
15  
16  
17

18 Motor vehicle collisions (MVCs) are a significant cause of morbidity and mortality throughout the  
19 world accounting for 1.35 million deaths and between 20 and 50 million injuries worldwide per  
20 annum [5]. To our knowledge no studies have considered the differences in injury patterns,  
21 entrapment status and morbidity and mortality outcomes between female and male patients.  
22 Failure to collect and analyse sex-disaggregated data is a common concern in research; whilst most  
23 studies present baseline demographic data by sex, far fewer report outcome data by sex or conduct  
24 sex and gender-based analysis (SGBA) [1,6]. Failure to carry out SGBA can have serious  
25 consequences for patient outcome. As an example, female patients are 50% more likely to be  
26 misdiagnosed when experiencing a myocardial infarction due to persistent gender-blind research  
27 which overlooked different presentation of symptoms in women compared to men. Women's  
28 symptoms have been labelled 'atypical' despite being experienced by half of the population [7].  
29  
30  
31  
32  
33  
34  
35  
36  
37

38 Following an MVC some occupants will be trapped and be unable to exit the vehicle without  
39 assistance [8]. Those who are physically trapped will require the assistance of fire and rescue  
40 services to perform a mechanical intervention to the vehicle to create space for extrication [9].  
41 Patients who are medically trapped due to pain or disability will require physical assistance,  
42 analgesia and the application of spinal precautions or reassurance that such precautions are not  
43 required. Patients who are trapped have worse outcomes than those who are not trapped [8].  
44  
45  
46  
47  
48  
49

50 We could find no previous sex-disaggregated data which report injury patterns for patients trapped  
51 following an MVC. This information would be useful for those triaging, rescuing or treating patients.  
52 There may be additional value of sex-disaggregated data to target public health interventions and  
53 the design of safety systems such as restraint devices and airbags.  
54  
55  
56  
57

58 The aims of this study were to define the probability of entrapment, frequency of injury, and  
59 outcomes by the sex of the casualty.  
60

## Methods

A retrospective review of the UK Trauma Audit and Research Network (TARN) database was carried out including patients injured between 1<sup>st</sup> January 2012 and 31<sup>st</sup> December 2019. TARN collects data from Major Trauma Centres and Trauma Units in the UK. Eligibility criteria for inclusion in the TARN database include trauma patients who are admitted to hospital for  $\geq 72$  hours, or are admitted to a critical care unit, or die in hospital or are transferred to another hospital for specialist care. Pre-hospital deaths, isolated closed fractures of the limbs and hip fractures in patients over the age of 65 are not included. TARN includes routine data on patient demographics, physiology, interventions, injuries and in some circumstances (including MVCs) the trapped status of the patient.

Inclusion criteria were patients aged 16 years or older, with mechanism coded as "Vehicle Incident/Collision", directly admitted to a TARN participating hospital in England and with complete documented outcomes. To ensure data quality, patients were excluded if they underwent secondary transfer from another hospital or when the trapped status was not documented on the database.

For patients that met the inclusion criteria, data fields including sex, age, trapped status, injury severity score (ISS), abbreviated injury scale (AIS) for each body region, any details of spinal injury and significant time dependent injuries as described in previous work were made available for analysis [8].

Simple descriptive analysis was used to define the characteristics of the female and male groups. Levene's test was used to assess equality of variances and a two-tailed t-test to compare means and Mann-Whitney test for comparing medians. Chi square test was used for categorical variables. *P* values of less than 0.01 were considered significant due to multiple analyses being performed. The relationship between age, sex, and trapped status was explored further using multivariate logistical regression. SPSS (IBM Corp v.23 Armonk, NY) and Stata (StataCorp. 2015. Stata Statistical Software: Release 14. College Station, TX) were used for the analyses. Additional analyses which were not pre-specified: injuries of patients who were excluded for incomplete entrapment data, injuries sustained by year over time, and a passenger / driver analysis. Analyses which are not prespecified are included in the supplemental file.

TARN data analyses are conducted using anonymised data which is governed by a code of practice approved by the Confidentiality Advisory Group who are appointed by the Health Research Authority. Additional individual ethical approval was not required for this analysis.

## Patient and public involvement

TARN has patient and public involvement on the TARN Board which has oversight of the research portfolio. For this specific analysis we sought the opinions of the advocacy group GENDRO.

## Results

Between 2012 and 2019, there were 450 437 cases identified in total on the TARN database. Following exclusions, data for 71,719 patients from a MVC were identified of which 70,027 patients had a known trapped status were analysed (Figure 1).

The characteristics of each group are summarized in Table 1. Twenty-six percent of patients were female. The average age (SD) across all eligible patients was 46.2 (20.1); female patients were older than male patients (52.4 (SD 22.0) vs 44.1 (SD 18.9),  $p < 0.0001$ ). Female patients had less severe injury ( $p < 0.0001$ ). Mean (median for GCS) physiological variables were similar for female and male patients. Small differences in heart rate, respiratory rate and oxygen saturations demonstrated statistical but not clinically significant differences.

Of patients who survived to hospital, 3,868 (5.5%) died within 30 days of initial injury. Female patients had statistically worse survival although the difference was small (94.0% versus 94.6%,  $p = 0.001$ ). A higher proportion of female patients were trapped than male patients ( $p < 0.0001$ ). Of the population of patients who were trapped, female patients had better outcomes (92.3% alive at 30 days compared to 90.0% of males,  $p = 0.01$ ).

**Table 1: Demographics, outcomes and physiology**

|                                    | All Trapped and Not Trapped |              |              |         | Only Trapped |              |         |
|------------------------------------|-----------------------------|--------------|--------------|---------|--------------|--------------|---------|
|                                    | Total                       | Female       | Male         | P value | Female       | Male         | P value |
| Number (%)                         | 70027                       | 18175 (26.0) | 51852 (74.0) | <0.0001 | 2879 (37.1)  | 4875 (62.9)  | <0.0001 |
| Age (mean, SD)                     | 46.2 (20.1)                 | 52.4 (22.0)  | 44.1 (18.9)  | <0.0001 | 50.1 (21.8)  | 42.9 (19.7)  | <0.0001 |
| ISS (Median, IQR)                  | 13 (9-22)                   | 13 (9-22)    | 13 (9-24)    | <0.0001 | 17 (9-27)    | 19 (10-29)   | <0.0001 |
| Driver of vehicle (%)              | 16600                       | 5132 (30.9)  | 11468 (69.1) | <0.0001 | 1623 (31.9)  | 3471 (68.1)  | <0.0001 |
| Systolic Blood Pressure (mean, SD) | 133.3 (28.0)                | 133.1 (30.2) | 133.4 (27.2) | 0.361   | 128.7 (30.7) | 129.5 (30.9) | 0.309   |
| Heart Rate (mean, SD)              | 86.7 (22.2)                 | 87.9 (21.9)  | 86.2 (22.3)  | <0.001  | 91.2 (24.2)  | 92.1 (26.3)  | 0.185   |
| Respiratory Rate (mean, SD)        | 20.3 (6.9)                  | 20.3 (6.7)   | 20.3 (7.0)   | 0.833   | 21.3 (7.3)   | 21.5 (8.2)   | 0.207   |
| Oxygen Saturation (mean, SD)       | 96.1 (7.9)                  | 96.2 (7.3)   | 96.0 (8.0)   | 0.001   | 97.4 (5.9)   | 97.3 (5.9)   | 0.544   |
| GCS ISS (Median, IQR)              | 15 (15-15)                  | 15 (15-15)   | 15 (15-15)   | n/a     | 15 (14-15)   | 15 (14-15)   | n/a     |
| Alive at 30 days (n,%)             | 66159 (94.5)                | 17084 (94.0) | 49075 (94.6) | 0.001   | 2657 (92.3)  | 4396 (90.0)  | 0.01    |

Table 2 and 3 show that trapped female and male patients demonstrated significant differences in the incidence of thoracic and spinal injuries. Tension pneumothorax was more common in male patients and dens fractures were more common in female patients (both  $p < 0.0001$ ). Spinal cord injuries were also more common in female patients ( $p = 0.038$ ). When trapped, male patients were more likely to suffer from head, face, thoracic and limb injuries (all  $p < 0.0001$ , Table 3), while female patients were more likely to have pelvic ( $p < 0.0001$ ) and spinal injuries ( $p < 0.001$ ). The incidence of abdominal injuries was similar in female and male patients.

**Table 2: Significant injuries by sex for trapped casualties**

|                                           | Female | %    | Male | %    | P value |
|-------------------------------------------|--------|------|------|------|---------|
| Pelvic ring fracture with blood loss >20% | 23     | 0.8  | 48   | 1.0  | 0.394   |
| Blood loss >20% (%)                       | 114    | 4.0  | 161  | 3.3  | 0.139   |
| Tension pneumothorax (%)                  | 26     | 0.9  | 92   | 1.9  | <0.0001 |
| Multiple spinal fractures (%)             | 429    | 14.9 | 649  | 13.3 | 0.54    |
| Dens fracture (%)                         | 85     | 3.0  | 79   | 1.6  | <0.0001 |
| Spinal compression fracture grade 2/3 (%) | 66     | 2.3  | 75   | 1.5  | 0.022   |
| Unstable spinal fracture (%)              | 276    | 9.6  | 441  | 9.0  | 0.43    |
| Spinal cord injury (%)                    | 218    | 7.6  | 308  | 6.3  | 0.038   |

Injuries are not mutually exclusive; patients may have more than one qualifying injury

**Table 3: Injury site by sex for trapped casualties**

|                 | Female | %    | Male | %    | P value     |
|-----------------|--------|------|------|------|-------------|
| Head AIS 3+     | 578    | 20.1 | 1318 | 27.0 | <0.000<br>1 |
| Face AIS 3+     | 6      | 0.2  | 46   | 0.9  | <0.000<br>1 |
| Thoracic AIS 3+ | 1438   | 49.9 | 2721 | 55.8 | <0.000<br>1 |
| Abdomen AIS 3+  | 355    | 12.3 | 595  | 12.2 | 0.87        |
| Spine AIS3+     | 359    | 12.5 | 485  | 9.9  | 0.001       |
| Pelvic AIS 3+   | 420    | 14.6 | 475  | 9.7  | <0.000<br>1 |
| Limb AIS 3+     | 778    | 27.0 | 1744 | 35.8 | <0.000<br>1 |

Injuries are not mutually exclusive; patients may have more than one qualifying injury

Figure 2 demonstrates the interaction between adjusted mortality, trapped status and age. This analysis adjusts for the interaction between age and sex, ISS, GCS and the Charlson Comorbidity Index. In this adjusted analysis, trapped male patients were more likely to die but the 95% confidence intervals overlapped between the male and female groups for all age categories.

Figure 3 displays the interaction between probability of entrapment, sex and age. Female patients were more likely to be trapped in all the age groups considered except in patients aged 80 and over.

## Discussion

This is the largest analysis to date of sex-disaggregated data for trauma patients following an MVC and confirms significant differences in injury patterns and trapped status between female and male patients.

The explanations for these differences are likely to include both reasons pertaining to biological sex e.g. physical size, muscle mass, hormonal differences and reasons pertaining to gender such as driving behaviours, post-collision behaviours, and responses by emergency responders such as decisions related to extrication.

Female patients in this analysis had a lower ISS and tended to be older than male patients. These differences were more apparent in those patients that were trapped. The recorded physiological observations are broadly similar between sexes.



1  
2  
3 There are gender-related differences that may contribute to the observed differences. Men drive  
4 more miles, faster, in a riskier manner and more frequently have accidents, resulting in the higher  
5 injury burden and mortality as seen in this analysis and elsewhere [10–13]. Women make up a  
6 higher proportion of older drivers [14]. Older women are more likely than men of equivalent age to  
7 be killed or seriously injured in collisions, after controlling for miles driven; whereas young men have  
8 the highest risk of serious injury or death per million miles driven [11].  
9

10  
11  
12 Trapped male patients were more likely to have severe injuries of the head, face, chest (including  
13 tension pneumothorax) and limbs, with female patients more likely to have injuries of the vertebrae,  
14 spinal cord and pelvis. No statistically significant differences were found between trapped female  
15 and male patients in relation to pelvic ring injuries with blood loss, multiple spinal fractures or  
16 abdominal injuries.  
17

18  
19 Differences in injuries may be accounted for by i) differences in car usage, kinematics, and  
20 mechanism of injury (MOI), ii) differences in effectiveness and availability of safety systems and iii)  
21 differences in biological propensity to certain injury types.  
22

23  
24  
25 Difference in kinematics and resultant mechanism of injury. An analysis of the UK-based STATS-19  
26 MVC registry demonstrates that male drivers are more likely to have MVCs whilst travelling forwards  
27 (64.2% vs 56.5%) whereas female drivers are more likely to have collisions whilst manoeuvring  
28 (16.1% vs 11.9%) or turning (10.7% vs 8.4%). Similar findings are reported in the United States, with  
29 female patients more likely to be involved in a side impact MVC and male patients more likely to  
30 have a frontal impact [15]. Side impact MVCs result in a transfer of energy to the patient that is  
31 more likely to cause significant spinal injury [16]. Side impacts are also a common cause of lateral  
32 compression fractures of the pelvis [17,18] which may explain the finding of an increased prevalence  
33 of these injuries in female patients. It is rare for lateral compression fractures of the pelvis to be  
34 associated with significant bleeding which perhaps accounts for the higher rate of pelvic fractures in  
35 female patients but not a high rate of pelvic fractures with significant blood loss [19].  
36  
37  
38  
39  
40  
41  
42  
43  
44  
45  
46  
47  
48  
49  
50

51  
52 Male patients experience a higher rate of frontal collisions, which may account for the increased  
53 rate of head, face and chest injury found in this study, through interactions and resultant energy  
54 transfer with the steering wheel and/or air bag [20,21]. The higher rate of male drivers and their  
55 interactions with the pedals and the “bracing” experienced by drivers pre-collision may explain the  
56 higher rate of limb injury seen in male patients in this study [22,23].  
57  
58  
59  
60

1  
2  
3  
4  
5 Differences in availability and effectiveness of safety systems. Safety systems are less effective for  
6 passengers than drivers and are optimised to minimise energy transfer from frontal collisions  
7 [22,24,25].  
8  
9

10  
11 It has been previously demonstrated that women are more likely to be compliant with safety  
12 systems such as seat belts than men and as a result have less risk of multiple and severe injuries and  
13 their associated mortality [26,27]. However, the safety features incorporated in modern cars are less  
14 likely to be effective for women. Current mandatory crash testing uses a scaled-down 50th centile  
15 male mannequin to represent 5<sup>th</sup> percentile females and are not modelled to account for  
16 anthropometric differences between females and males [28–31]. This systemic bias, with cars  
17 developed, tested and safety-rated using primarily an anatomically correct, weighted and  
18 biomechanically-matched male mannequin has led to the development of safety systems which are  
19 likely to be more effective for males than females. For example, whiplash protection systems are  
20 significantly more effective at preventing injury in men than women [29,32]. Comparison of female  
21 and male dummies demonstrates higher biomechanical response in the female dummy in the neck  
22 region which may offer some explanation for the increased rate of spinal fractures in female patients  
23 found in our study [33].  
24  
25  
26  
27  
28  
29  
30  
31  
32  
33

34  
35 Moreover, female patients are more likely to drive and be injured in smaller cars, with less efficient  
36 safety systems. Smaller cars are associated with a greater injury burden and may account for some  
37 of the sex-related differences seen in this study [34].  
38  
39  
40

41  
42 Female patients are biologically prone to certain injury types. The intersection of age, biological  
43 differences, female propensity to injury and medical conditions such as osteoporosis may further  
44 account for some of the differences in injuries seen in this analysis [35]. Females and males differ  
45 physically in ways which are pertinent to injury and entrapment in RTCs. They each have unique  
46 anthropometry for example: females have wider pelvic measurements and shorter torsos, even  
47 controlled for height difference [36]. As such, female pelvic geometry may be more prone to injury  
48 following a side impact [37]. A combination of these factors may explain the differences seen in  
49 injury patterns in this study; we found a greater proportion of pelvic fractures in females, and a  
50 higher rate of head and chest injury in male patients.  
51  
52  
53  
54  
55  
56  
57  
58  
59  
60

1  
2  
3 Sex hormones affect body composition. Testosterone contributes significantly greater skeletal  
4 muscle mass (8% greater, after correcting for BMI) in males, which does not start to fall until the  
5 fifth decade [38]. Female sex hormones are responsible for ligaments in females being more lax,  
6 which combined with females' cervical vertebrae being smaller than males of equivalent head size,  
7 may explain the greater rate of spinal cord injury in females [39,40]. Post-menopausal changes in  
8 bone composition mean that females have a 50% greater loss of bone in old age compared to males,  
9 again making them susceptible to fractures as a result of MVC [35].  
10  
11  
12  
13  
14  
15

16 Female patients were more likely than male patients to be trapped (15.8 vs 9.4%,  $p < 0.0001$ ). The  
17 mean age of trapped female patients was significantly higher than trapped male patients; this may  
18 influence their own ability to self-extricate due to frailty or relative immobility [41]. An additional  
19 possible explanation may include different treatment by rescuers, for example, perhaps being less  
20 likely to recommend or facilitate self-extrication for older females. Females are more likely to sit  
21 closer to the steering wheel, meaning that less movement intrusion of the dashboard and steering  
22 wheel is required to cause entrapment [42]. Furthermore, this study found that female patients are  
23 more likely to have injuries of the pelvis and spine and these injuries may prevent self-extrication  
24 and increase the frequency of entrapment.  
25  
26  
27  
28  
29  
30  
31  
32

33 Post-collision behaviour and patient experience differences between female and male patients may  
34 contribute to the increased rate of entrapment in females, who are more likely to experience multi-  
35 region and widespread pain following a MVC, which may prevent them leaving the vehicle without  
36 assistance [43]. TARN does not record whether a patient was physically trapped by vehicle  
37 deformation or medically trapped (e.g. by pain) which prevents further analysis within this dataset.  
38  
39  
40  
41  
42

43 Trapped female patients had a lower ISS than trapped male patients and were less likely to die (7.7%  
44 vs 10.0%). However, once the factors in our model were considered (age, sex, ISS, GCS and Charlson  
45 Comorbidity Index) no difference in mortality was found between female and male patients (Figure  
46 2).  
47  
48  
49  
50

51 This study shows that men and women experience different rates of entrapment and different injury  
52 patterns when involved in MVCs. This may have implications for the design of car safety systems, so  
53 as to protect men and women equally. Likewise, for prehospital clinicians, this work highlights the  
54 differences seen in clinical practice when attending MVCs.  
55  
56  
57  
58  
59  
60

1  
2  
3 The higher rate of female entrapment seen may in part be explained by this cohort being older and  
4 having greater co-morbidity. Current UK extrication dogma still prioritises 'spinal precaution'  
5 methods of extrication that involve the patient being passive in the process. A greater focus on self-  
6 extrication as a safe alternative to rescue service assisted extrication may in future reduce the  
7 number of medically trapped patients.  
8  
9

10  
11  
12 Not all patients trapped in a MVC were included in this study due to the TARN inclusion criteria. Of  
13 note, pre-hospital deaths from the most severe MVCs are not included, nor were patients who  
14 received minor injuries but were physically trapped by mechanical deformation of the vehicle. This  
15 study was unable to distinguish entrapment due to medical causes (e.g. pain or relative immobility)  
16 from physical entrapment due to vehicle deformity, which implies a greater energy transfer collision.  
17 This analysis did not discriminate between the type of vehicle (e.g. car or bus/coach or light/heavy  
18 goods vehicle) and includes all occupants of vehicles involved in a motor vehicle collision which is a  
19 heterogenous group. The "trapped" status recorded on TARN has high data completeness with only  
20 2.4% of patients having this element missing; the route of completion varies between centres but is  
21 normally taken from the ambulance service patient report form. The "trapped" definition is open to  
22 interpretation and cannot distinguish between type and mode of entrapment. These limitations may  
23 hinder our interpretation of trapped status.  
24  
25  
26  
27  
28  
29  
30  
31  
32  
33

### 34 **Conclusions**

35  
36  
37 Male patients are more severely injured and die as a result of MVC than female patients. Female  
38 patients under 80 are more frequently trapped than male patients. Female patients are more likely  
39 to have spinal and pelvic injuries and male patients are more likely to have head, face, thoracic and  
40 limb injuries. Differences in driving behaviours, kinematics, collision type, position in vehicle, the  
41 efficacy of safety systems, biological vulnerability to certain injury types and post-injury behaviour  
42 may all have influence on these patterns.  
43  
44  
45  
46  
47  
48

49 Sex-disaggregated data on mortality, entrapment and injury patterns in motor-vehicle collisions may  
50 help to inform vehicle manufacturers, emergency services personnel and road-safety organisations  
51 to tailor responses with the aim of equitable outcomes by targeting equal performance of safety  
52 measures and reducing excessive risk to one sex or gender. Future work should include appropriate  
53 sex- and gender-based analyses designed to shed light on the biological and sociocultural factors  
54 that create differential experience and outcomes for women and men involved in motor vehicle  
55 collisions.  
56  
57  
58  
59  
60

## Declarations

### Ethics approval

TARN data analyses are conducted using anonymised data which is governed by a code of practice approved by the Confidentiality Advisory Group who are appointed by the Health Research Authority as such additional individual ethical approval was not required for this analysis in the UK. The Faculty of Health Sciences Human Research Ethics Committee granted ethical approval for this study, Ref 180/2021.

### Consent for publication

Not applicable.

### Data availability statement

The datasets used and/or analysed during the current study are available from the corresponding author on reasonable request.

### Competing interests

The authors declare that they have no competing interests.

### Funding

Publication costs were funded by a charitable grant from the Road Safety Trust (award/grant number NA). The Road Safety Trust had no role in the design, data collection, analysis or writing of this manuscript.

### Contributors

TN, LW, SH, RF, JS and WS contributed to the conception and study design, analysis and interpretation of data, drafting and revising the manuscript. OB contributed to the analysis and interpretation of the data and critically revised the manuscript. All authors read and approved the final manuscript.

### Acknowledgments

We would like to thank TARN and the TARN research committee for their support. Thank you to Caroline Leech who provided feedback on an early draft of the manuscript.

### References

- 1  
2  
3 1 Heidari S, Bachelet VC. Sex and gender analysis for better science and health equity. *Lancet*  
4 2018;392:1500–2. doi:10.1016/s0140-6736(18)32619-9  
5  
6  
7 2 NCEPOD. Trauma: Who Cares? *NCEPOD 2007*;:1–151. www.ncepod.org.uk.  
8  
9 3 Kehoe A, Smith JE, Edwards A, *et al.* The changing face of major trauma in the UK. *Emerg Medicine*  
10 *J Emj* 2015;32:911–5. doi:10.1136/emered-2015-205265  
11  
12 4 TARN. Major Trauma in Older People. Published Online First:  
13 2017. [https://www.tarn.ac.uk/content/downloads/3793/Major%20Trauma%20in%20Older%20Peopl](https://www.tarn.ac.uk/content/downloads/3793/Major%20Trauma%20in%20Older%20People%202017.pdf)  
14 [e%202017.pdf](https://www.tarn.ac.uk/content/downloads/3793/Major%20Trauma%20in%20Older%20People%202017.pdf)  
15  
16  
17 5 WHO. Global status report on road safety 2015. Published Online First:  
18 2015. <https://apps.who.int/iris/handle/10665/189242>  
19  
20 6 Avery E, Clark J. Sex-related reporting in randomised controlled trials in medical journals. *Lancet*  
21 2016;388:2839–40. doi:10.1016/s0140-6736(16)32393-5  
22  
23 7 Wu J, Gale CP, Hall M, *et al.* Editor’s Choice - Impact of initial hospital diagnosis on mortality for  
24 acute myocardial infarction: A national cohort study. *European Hear J Acute Cardiovasc Care*  
25 2016;7:139–48. doi:10.1177/2048872616661693  
26  
27  
28 8 Nutbeam T, Fenwick R, Smith J, *et al.* A comparison of the demographics, injury patterns and  
29 outcome data for patients injured in motor vehicle collisions who are trapped compared to those  
30 patients who are not trapped. *Scand J Trauma Resusc Emerg Medicine* 2021;29:17.  
31 doi:10.1186/s13049-020-00818-6  
32  
33  
34 9 Fenwick R, Nutbeam T. Medical vs. true physical traffic collision entrapment. *J Paramedic Pract*  
35 2018;10:158–62. doi:10.12968/jpar.2018.10.4.158  
36  
37  
38 10 Al-Balbissi AH. Role of Gender in Road Accidents. *Traffic Inj Prev* 2003;4:64–73.  
39 doi:10.1080/15389580309857  
40  
41  
42 11 Massie DL, Green PE, Campbell KL. Crash involvement rates by driver gender and the role of  
43 average annual mileage. *Accid Analysis Prev* 1997;29:675–85. doi:10.1016/s0001-4575(97)00037-7  
44  
45 12 Tamás V, Kocsor F, Gyuris P, *et al.* The Young Male Syndrome—An Analysis of Sex, Age, Risk  
46 Taking and Mortality in Patients With Severe Traumatic Brain Injuries. *Front Neurol* 2019;10:366.  
47 doi:10.3389/fneur.2019.00366  
48  
49 13 WHO. Gender and Road Traffic Injuries. *Gender and Health* 2002.  
50  
51 14 Transport D of. Reported road casualties in Great Britain: provisional results 2019. 2020.  
52 [https://assets.publishing.service.gov.uk/government/uploads/system/uploads/attachment\\_data/file](https://assets.publishing.service.gov.uk/government/uploads/system/uploads/attachment_data/file/904698/rrcgb-provisional-results-2019.pdf)  
53 [/904698/rrcgb-provisional-results-2019.pdf](https://assets.publishing.service.gov.uk/government/uploads/system/uploads/attachment_data/file/904698/rrcgb-provisional-results-2019.pdf)  
54  
55 15 Bose D, ScD MS-G, Crandall JR. Vulnerability of Female Drivers Involved in Motor Vehicle Crashes:  
56 An Analysis of US Population at Risk. *Am J Public Health* 2011;101:2368–73.  
57 doi:10.2105/ajph.2011.300275  
58  
59  
60

- 1  
2  
3 16 Maak TG, Ivancic PC, Tominaga Y, *et al.* Side Impact Causes Multiplanar Cervical Spine Injuries. *J Trauma Inj Infect Critical Care* 2007;63:1296–307. doi:10.1097/01.ta.0000241237.72420.51  
4  
5  
6  
7 17 Coccolini F, Stahel PF, Montori G, *et al.* Pelvic trauma: WSES classification and guidelines. *World J Emerg Surg Wjes* 2017;12:5. doi:10.1186/s13017-017-0117-6  
8  
9  
10 18 Scott I, Porter K, Laird C, *et al.* The prehospital management of pelvic fractures: initial consensus statement. *Emerg Med J* 2013;30:1070. doi:10.1136/emmermed-2013-203211  
11  
12  
13 19 Magnussen RA, Tressler MA, Obremskey WT, *et al.* Predicting Blood Loss in Isolated Pelvic and Acetabular High-Energy Trauma. *J Orthop Trauma* 2007;21:603–7. doi:10.1097/bot.0b013e3181599c27  
14  
15  
16  
17  
18 20 Fadl SA, Sandstrom CK. Pattern Recognition: A Mechanism-based Approach to Injury Detection after Motor Vehicle Collisions. *Radiographics* 2019;39:857–76. doi:10.1148/rg.2019180063  
19  
20  
21 21 . Gloyns PF, Rattenbury SJ, Rivlin AZ, *et al.* Steering Wheel Induced Head and Facial Injuries Amongst Drivers Restrained by Seat Belts. *Accident Research Unit, Department of Transportation*  
22  
23  
24  
25 22 Bose D, Crandall JR. Influence of Active Muscle Contribution on the Injury Response of Restrained Car Occupants. *Annals of Advances in Automotive Medicine* 2008.  
26  
27  
28 23 Neale M, Thomas R, Bateman H, *et al.* A FINITE ELEMENT MODELLING INVESTIGATION OF LOWER LEG INJURIES. In: *20th International Technical Conference on the Enhanced Safety of Vehicles*. 2007. <http://www-nrd.nhtsa.dot.gov/departments/esv/20th/>  
29  
30  
31  
32 24 Daskal Y, Alfici R, Givon A, *et al.* Evaluation of differences in injury patterns according to seat position in trauma victims survived traffic accidents. *Chin J Traumatology* 2018;21:273–6. doi:10.1016/j.cjtee.2018.03.001  
33  
34  
35  
36  
37 25 Pedley DK, Thakore S. Difference in injury pattern between drivers and front seat passengers involved in road traffic accidents in Scotland. *Emerg Med J* 2004;21:197. doi:10.1136/emj.2003.012369  
38  
39  
40  
41  
42 26 Schermer CR, Omi EC, Ton-That H, *et al.* A Clustering of Injury Behaviors. *J Trauma Inj Infect Critical Care* 2008;65:1000–4. doi:10.1097/ta.0b013e318182f76b  
43  
44  
45  
46 27 Febres JD, García-Herrero S, Herrera S, *et al.* Influence of seat-belt use on the severity of injury in traffic accidents. *Eur Transp Res Rev* 2020;12:9. doi:10.1186/s12544-020-0401-5  
47  
48  
49 28 Linder A, Svedberg W. Review of average sized male and female occupant models in European regulatory safety assessment tests and European laws: Gaps and bridging suggestions. *Accid Analysis Prev* 2019;127:156–62. doi:10.1016/j.aap.2019.02.030  
50  
51  
52  
53 29 Carlsson A, Chang F, Lemmen P, *et al.* Anthropometric Specifications, Development, and Evaluation of EvaRID—A 50th Percentile Female Rear Impact Finite Element Dummy Model. *Traffic Inj Prev* 2014;15:855–65. doi:10.1080/15389588.2014.885647  
54  
55  
56  
57 30 Carlsson A, Linder A, Davidsson J, *et al.* Dynamic Kinematic Responses of Female Volunteers in Rear Impacts and Comparison to Previous Male Volunteer Tests. *Traffic Inj Prev* 2011;12:347–57. doi:10.1080/15389588.2011.585408  
58  
59  
60

- 1  
2  
3 31 Linder A, Svensson MY. Road safety: the average male as a norm in vehicle occupant crash safety  
4 assessment. *Interdiscipl Sci Rev* 2019;44:140–53. doi:10.1080/03080188.2019.1603870  
5  
6  
7 32 Viano DC. Seat Influences on Female Neck Responses in Rear Crashes: A Reason Why Women  
8 Have Higher Whiplash Rates. *Traffic Inj Prev* 2003;4:228–39. doi:10.1080/15389580309880  
9  
10 33 Parenteau CS, Zuby D, Karin B, Brolin, *et al*. Restrained Male and Female Occupants in Frontal  
11 Crashes: Are We Different? *IRCOBI Conference 2013* 2013.  
12  
13 34 Brumbelow ML, Jermakian JS. Injury risks and crashworthiness benefits for females and males:  
14 Which differences are physiological? *Traffic Inj Prev* 2021;:1–6.  
15 doi:10.1080/15389588.2021.2004312  
16  
17  
18 35 O'Neill T. The Relationship Between Bone Density and Incident Vertebral Fracture in Men and  
19 Women. *J Bone Miner Res* 2002;17:2214–21. doi:10.1359/jbmr.2002.17.12.2214  
20  
21 36 Fullenkamp AM. Gender Differences in NATO Anthropometry and the Implication for Protective  
22 Equipment. 2008.  
23  
24  
25 37 Klein KF, Reed MP, Rupp JD. Development of Geometric Specifications for a Small Female  
26 Anthropomorphic Test Device Pelvis. *The University of Michigan Transportation Research Institute*  
27 2016.  
28  
29 38 Janssen I, Heymsfield SB, Wang Z, *et al*. Skeletal muscle mass and distribution in 468 men and  
30 women aged 18–88 yr. *J Appl Physiol* 2000;89:81–8. doi:10.1152/jappl.2000.89.1.81  
31  
32  
33 39 Shultz SJ, Sander TC, Kirk SE, *et al*. Sex differences in knee joint laxity change across the female  
34 menstrual cycle. *J Sports Medicine Phys Fit* 2005;45:594–603.  
35  
36 40 Stemper BD, Yoganandan N, Pintar FA, *et al*. Anatomical Gender Differences in Cervical Vertebrae  
37 of Size-Matched Volunteers. *Spine* 2008;33:E44–9. doi:10.1097/brs.0b013e318160462a  
38  
39 41 Nutbeam T, Kehoe A, Fenwick R, *et al*. Do Entrapment, Injuries, Outcomes and Potential for Self-  
40 extrication Vary with Age? A Pre-specified Analysis of the UK Trauma Registry (TARN). Published  
41 Online First: 2021. doi:10.21203/rs.3.rs-1076806/v1  
42  
43  
44 42 McFadden M, Powers J, Brown W, *et al*. Vehicle and Driver Attributes Affecting Distance from the  
45 Steering Wheel in Motor Vehicles. *Hum Factors J Hum Factors Ergonomics Soc* 2000;42:676–82.  
46 doi:10.1518/001872000779697971  
47  
48  
49 43 Beaudoin FL, Kessler RC, Hwang I, *et al*. Pain after a motor vehicle crash: The role of  
50 socio-demographics, crash characteristics and peri-traumatic stress symptoms. *Eur J Pain*  
51 2021;25:1119–36. doi:10.1002/ejp.1733  
52  
53  
54  
55  
56  
57  
58  
59  
60



1  
2  
3 **Figures tiles and legends:**  
4  
5

6 **Figure 1: Study profile**  
7

8 **Figure 2: Adjusted mortality and age**

9 Error bars = 95% Confidence Intervals.  
10

11 **Figure 3: Probability of entrapment and age**

12 Error bars = 95% Confidence Intervals.  
13  
14  
15  
16  
17  
18  
19  
20  
21  
22  
23  
24  
25  
26  
27  
28  
29  
30  
31  
32  
33  
34  
35  
36  
37  
38  
39  
40  
41  
42  
43  
44  
45  
46  
47  
48  
49  
50  
51  
52  
53  
54  
55  
56  
57  
58  
59  
60

For peer review only

1  
2  
3  
4  
5  
6  
7  
8  
9  
10  
11  
12  
13  
14  
15  
16  
17  
18  
19  
20  
21  
22  
23  
24  
25  
26  
27  
28  
29  
30  
31  
32  
33  
34  
35  
36  
37  
38  
39  
40  
41

Total patients recorded  
England 2012 - 2019  
**450,437**

Known outcome  
**433,836**

Direct Admission  
**407,465**

Age ≥ 16  
**391,035**

Vehicle incident/collision  
**71,719**

Not Trapped  
**62,273**

Trapped  
**7,754**

Unknown Trapping status  
**1,692**

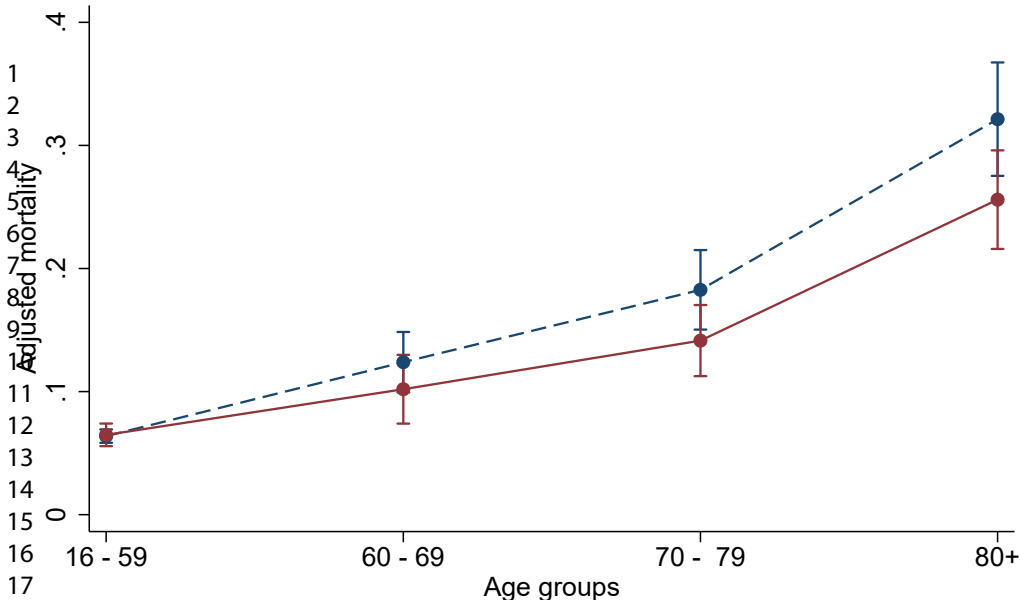

For peer review only - <http://bmjopen.bmj.com/site/about/guidelines.xhtml>

---●--- Male    —●— Female

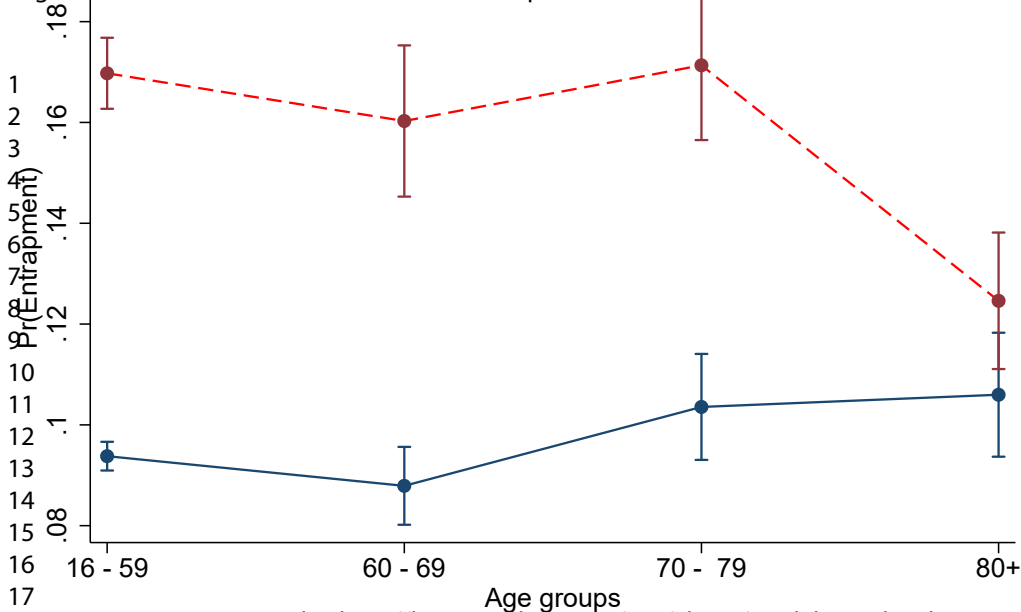

For peer review only - <http://bmjopen.bmj.com/site/about/guidelines.xhtml>

Male Female

**Characteristics and Mortality by Age 2012 - 2019 for Unknown trapped Status**

|                   |                    |                   | 16 - 59       | 60 - 69       |
|-------------------|--------------------|-------------------|---------------|---------------|
| gender            | Male               | Count             | 956           | 98            |
|                   |                    | Column N %        | 74.6%         | 61.6%         |
|                   | Female             | Count             | 325           | 61            |
|                   |                    | Column N %        | 25.4%         | 38.4%         |
|                   | <b>Total</b>       | <b>Count</b>      | <b>1281</b>   | <b>159</b>    |
|                   |                    | <b>Column N %</b> | <b>100.0%</b> | <b>100.0%</b> |
| ISS               | Median             |                   | 16            | 17            |
|                   | Percentile 25      |                   | 9             | 9             |
|                   | Percentile 75      |                   | 26            | 24            |
| prehosp_SBP       | Mean               |                   | 127           | 135           |
|                   | Standard Deviation |                   | 28            | 32            |
| prehosp_Pulse     | Mean               |                   | 91            | 88            |
|                   | Standard Deviation |                   | 26            | 25            |
| prehosp_RR        | Mean               |                   | 20            | 19            |
|                   | Standard Deviation |                   | 8             | 6             |
| prehosp_OxygenSat | Mean               |                   | 96            | 95            |
|                   | Standard Deviation |                   | 10            | 6             |
| GCS               | Count              |                   | 1281          | 159           |
|                   | Median             |                   | 15            | 15            |
|                   | Percentile 25      |                   | 14            | 15            |
|                   | Percentile 75      |                   | 15            | 15            |
| Alive             | Count              |                   | 1185          | 147           |
|                   | Column N %         |                   | 92.5%         | 92.5%         |
| Dead              | Count              |                   | 96            | 12            |
|                   | Column N %         |                   | 7.5%          | 7.5%          |

|        |       | Driver | Passenger |       |
|--------|-------|--------|-----------|-------|
| Male   | Count | 11468  | 3366      | 14834 |
|        | %     | 69.1%  | 43.9%     | 61.1% |
| Female | Count | 5132   | 4301      | 9433  |
|        | %     | 30.9%  | 56.1%     | 38.9% |
| Total  | Count | 16600  | 7667      | 24267 |

A chi square test shows highly significant proportion of Male driver than passenger.

|     |               | 2012 | 2013 | 2014 | 2015 |
|-----|---------------|------|------|------|------|
| ISS | Median        | 13   | 13   | 13   | 13   |
|     | Percentile 25 | 9    | 9    | 9    | 9    |
|     | Percentile 75 | 22   | 22   | 22   | 22   |
| Age | Median        | 42   | 43   | 44   | 44   |

|    |                       |               |               |       |       |       |       |
|----|-----------------------|---------------|---------------|-------|-------|-------|-------|
| 1  |                       |               |               |       |       |       |       |
| 2  |                       | Percentile 25 |               | 26.0  | 26.5  | 27.6  | 27.3  |
| 3  |                       | Percentile 75 |               | 57.9  | 57.6  | 59.7  | 59.1  |
| 4  | Head AIS3+            | Count         |               | 1399  | 1572  | 1806  | 1958  |
| 5  |                       | %             |               | 22.6% | 22.0% | 22.3% | 22.4% |
| 6  | Face AIS3+            | Count         |               | 27    | 33    | 37    | 49    |
| 7  |                       | %             |               | 0.4%  | 0.5%  | 0.5%  | 0.6%  |
| 8  | Thorax AIS3+          | Count         |               | 2123  | 2650  | 3016  | 3336  |
| 9  |                       | %             |               | 34.4% | 37.1% | 37.2% | 38.1% |
| 10 | Abdo AIS3+            | Count         |               | 460   | 561   | 633   | 685   |
| 11 |                       | %             |               | 7.4%  | 7.8%  | 7.8%  | 7.8%  |
| 12 | Spine AIS3+           | Count         |               | 448   | 540   | 669   | 710   |
| 13 |                       | %             |               | 7.3%  | 7.6%  | 8.3%  | 8.1%  |
| 14 | Pelvis AIS3+          | Count         |               | 456   | 468   | 535   | 579   |
| 15 |                       | %             |               | 7.4%  | 6.5%  | 6.6%  | 6.6%  |
| 16 | Limb AIS3+            | Count         |               | 1888  | 2060  | 2343  | 2556  |
| 17 |                       | %             |               | 30.6% | 28.8% | 28.9% | 29.2% |
| 18 |                       |               |               |       |       |       |       |
| 19 |                       |               |               |       |       |       |       |
| 20 |                       |               |               |       |       |       |       |
| 21 |                       |               |               |       |       |       |       |
| 22 |                       |               |               |       |       |       |       |
| 23 |                       |               |               |       |       |       |       |
| 24 |                       |               |               |       |       |       |       |
| 25 |                       |               |               |       |       |       |       |
| 26 |                       |               |               | 2012  | 2013  | 2014  |       |
| 27 | <b>Male Driver</b>    | ISS           | Median        | 13    | 13    | 13    |       |
| 28 |                       |               | Percentile 25 | 9     | 9     | 9     |       |
| 29 |                       |               | Percentile 75 | 25    | 24    | 24    |       |
| 30 |                       | Age           | Median        | 42    | 43    | 43    |       |
| 31 |                       |               | Percentile 25 | 26.0  | 26.3  | 27.0  |       |
| 32 |                       |               | Percentile 75 | 60.3  | 61.1  | 60.3  |       |
| 33 |                       | Head AIS 3+   | Count         | 215   | 230   | 263   |       |
| 34 |                       |               | %             | 20.7% | 19.7% | 20.5% |       |
| 35 |                       | Face AIS 3+   | Count         | 9     | 8     | 10    |       |
| 36 |                       |               | %             | 0.9%  | 0.7%  | 0.8%  |       |
| 37 |                       | Thorax AIS 3+ | Count         | 454   | 548   | 599   |       |
| 38 |                       |               | %             | 43.8% | 47.0% | 46.7% |       |
| 39 |                       | Abdo AIS 3+   | Count         | 86    | 92    | 115   |       |
| 40 |                       |               | %             | 8.3%  | 7.9%  | 9.0%  |       |
| 41 |                       | Spine AIS 3+  | Count         | 98    | 85    | 135   |       |
| 42 |                       |               | %             | 9.5%  | 7.3%  | 10.5% |       |
| 43 |                       | Pelvis AIS 3+ | Count         | 67    | 62    | 72    |       |
| 44 |                       |               | %             | 6.5%  | 5.3%  | 5.6%  |       |
| 45 |                       | Limb AIS 3+   | Count         | 262   | 247   | 280   |       |
| 46 |                       |               | %             | 25.3% | 21.2% | 21.8% |       |
| 47 |                       |               |               |       |       |       |       |
| 48 |                       |               |               |       |       |       |       |
| 49 |                       |               |               |       |       |       |       |
| 50 |                       |               |               |       |       |       |       |
| 51 | <b>Male Passenger</b> | ISS           | Median        | 14    | 16    | 13    |       |
| 52 |                       |               | Percentile 25 | 9     | 9     | 9     |       |
| 53 |                       |               | Percentile 75 | 25    | 25    | 22    |       |
| 54 |                       | Age           | Median        | 27    | 27    | 29    |       |
| 55 |                       |               | Percentile 25 | 20.5  | 21.2  | 20.9  |       |
| 56 |                       |               | Percentile 75 | 45.7  | 44.8  | 49.1  |       |
| 57 |                       | Head3         | Count         | 79    | 79    | 82    |       |
| 58 |                       |               | %             | 23.5% | 25.5% | 22.3% |       |
| 59 |                       | Face3         | Count         | 5     | 1     | 3     |       |
| 60 |                       |               |               |       |       |       |       |

|  |        |       |       |       |       |
|--|--------|-------|-------|-------|-------|
|  |        | %     | 1.5%  | 0.3%  | 0.8%  |
|  | Thor3  | Count | 147   | 138   | 160   |
|  |        | %     | 43.8% | 44.5% | 43.6% |
|  | Abdo3  | Count | 38    | 22    | 46    |
|  |        | %     | 11.3% | 7.1%  | 12.5% |
|  | Spine3 | Count | 38    | 32    | 56    |
|  |        | %     | 11.3% | 10.3% | 15.3% |
|  | Pelv3  | Count | 28    | 23    | 17    |
|  |        | %     | 8.3%  | 7.4%  | 4.6%  |
|  | limb3  | Count | 59    | 64    | 51    |
|  |        | %     | 17.6% | 20.6% | 13.9% |

For peer review only

|  | 70 - 79       | 80+           | Total         |
|--|---------------|---------------|---------------|
|  | 65            | 54            | 1173          |
|  | 44.5%         | 50.9%         | 69.3%         |
|  | 81            | 52            | 519           |
|  | 55.5%         | 49.1%         | 30.7%         |
|  | <b>146</b>    | <b>106</b>    | <b>1692</b>   |
|  | <b>100.0%</b> | <b>100.0%</b> | <b>100.0%</b> |
|  | 17            | 13            | 16            |
|  | 9             | 9             | 9             |
|  | 25            | 24            | 26            |
|  | 143           | 149           | 131           |
|  | 35            | 32            | 30            |
|  | 90            | 84            | 90            |
|  | 22            | 19            | 25            |
|  | 21            | 21            | 20            |
|  | 6             | 7             | 8             |
|  | 95            | 95            | 95            |
|  | 9             | 5             | 10            |
|  | 146           | 106           | 1692          |
|  | 15            | 15            | 15            |
|  | 14            | 15            | 14            |
|  | 15            | 15            | 15            |
|  | 121           | 85            | 1538          |
|  | 82.9%         | 80.2%         | 90.9%         |
|  | 25            | 21            | 154           |
|  | 17.1%         | 19.8%         | 9.1%          |

1  
2  
3  
4  
5  
6  
7  
8  
9  
10  
11  
12  
13  
14  
15  
16  
17  
18  
19  
20  
21  
22  
23  
24  
25  
26  
27  
28  
29  
30  
31  
32  
33  
34  
35  
36  
37  
38  
39  
40  
41  
42  
43  
44  
45  
46  
47  
48  
49  
50  
51  
52  
53  
54  
55  
56  
57  
58  
59  
60

| Year | 2016 | 2017 | 2018 | 2019 | Total |                                       |
|------|------|------|------|------|-------|---------------------------------------|
|      | 13   | 13   | 13   | 13   | 13    | ISS: p<0.0001 but not clinically sig. |
|      | 9    | 9    | 9    | 9    | 9     |                                       |
|      | 24   | 24   | 24   | 22   | 22    | Age: p<0.0001 not clinically sig.     |
|      | 46   | 46   | 47   | 48   | 45    |                                       |



|    |       |       |       |       |       |         |                                    |
|----|-------|-------|-------|-------|-------|---------|------------------------------------|
| 1  |       |       |       |       |       |         |                                    |
| 2  | 28.2  | 28.1  | 29.4  | 30.5  | 28.1  |         |                                    |
| 3  | 61.1  | 61.0  | 62.3  | 63.3  | 60.6  |         |                                    |
| 4  | 2134  | 2215  | 2329  | 2211  | 15624 | Head:   | Test on proportion not significant |
| 5  | 22.9% | 22.1% | 22.8% | 21.5% | 22.3% |         |                                    |
| 6  | 63    | 66    | 68    | 56    | 399   | Face:   | p=0.171                            |
| 7  | 0.7%  | 0.7%  | 0.7%  | 0.5%  | 0.6%  |         |                                    |
| 8  | 3567  | 3883  | 4071  | 4085  | 26731 | Thorax: | p<0.0001 small increase in%        |
| 9  | 38.2% | 38.8% | 39.9% | 39.7% | 38.2% |         |                                    |
| 10 | 704   | 803   | 855   | 831   | 5532  | Abdo:   | p=0.388                            |
| 11 | 7.5%  | 8.0%  | 8.4%  | 8.1%  | 7.9%  |         |                                    |
| 12 | 784   | 819   | 879   | 877   | 5726  | Spine:  | p=0.027                            |
| 13 | 8.4%  | 8.2%  | 8.6%  | 8.5%  | 8.2%  |         |                                    |
| 14 | 568   | 727   | 806   | 758   | 4897  | Pelvis: | p<0.0001                           |
| 15 | 6.1%  | 7.3%  | 7.9%  | 7.4%  | 7.0%  |         |                                    |
| 16 | 2651  | 2984  | 2872  | 2884  | 20238 | Limb:   | p=0.005                            |
| 17 | 28.4% | 29.8% | 28.2% | 28.0% | 28.9% |         |                                    |
| 18 |       |       |       |       |       |         |                                    |
| 19 |       |       |       |       |       |         |                                    |
| 20 |       |       |       |       |       |         |                                    |
| 21 |       |       |       |       |       |         |                                    |
| 22 |       |       |       |       |       |         |                                    |
| 23 |       |       |       |       |       |         |                                    |
| 24 |       |       |       |       |       |         |                                    |
| 25 |       |       | Year  |       |       |         |                                    |
| 26 | 2015  | 2016  | 2017  | 2018  | 2019  | Total   |                                    |
| 27 | 14    | 14    | 14    | 16    | 14    | 14      | p=0.033                            |
| 28 | 9     | 9     | 9     | 9     | 9     | 9       |                                    |
| 29 | 24    | 25    | 25    | 25    | 22    | 24      |                                    |
| 30 | 43    | 42    | 43    | 45    | 45    | 43      | p<0.0001                           |
| 31 | 26.7  | 28.4  | 27.6  | 29.1  | 29.3  | 27.6    |                                    |
| 32 | 64.1  | 63.1  | 61.5  | 63.8  | 66.0  | 62.7    |                                    |
| 33 | 295   | 342   | 341   | 354   | 332   | 2372    | p=0.496                            |
| 34 | 21.4% | 22.7% | 22.0% | 22.6% | 20.8% | 21.4%   |                                    |
| 35 | 9     | 10    | 10    | 6     | 12    | 74      | p=0.886                            |
| 36 | 0.7%  | 0.7%  | 0.6%  | 0.4%  | 0.8%  | 0.7%    |                                    |
| 37 | 646   | 747   | 750   | 761   | 764   | 5269    | p=0.168                            |
| 38 | 46.9% | 49.6% | 48.4% | 48.5% | 47.8% | 47.5%   |                                    |
| 39 | 136   | 122   | 152   | 168   | 164   | 1035    | p=0.070                            |
| 40 | 9.9%  | 8.1%  | 9.8%  | 10.7% | 10.3% | 9.3%    |                                    |
| 41 | 146   | 164   | 174   | 177   | 169   | 1148    | p=0.024                            |
| 42 | 10.6% | 10.9% | 11.2% | 11.3% | 10.6% | 10.4%   |                                    |
| 43 | 65    | 69    | 71    | 109   | 83    | 598     | p=0.034                            |
| 44 | 4.7%  | 4.6%  | 4.6%  | 6.9%  | 5.2%  | 5.4%    |                                    |
| 45 | 286   | 325   | 333   | 357   | 314   | 2404    | p=0.057                            |
| 46 | 20.8% | 21.6% | 21.5% | 22.8% | 19.6% | 21.7%   |                                    |
| 47 | 13    | 16    | 16    | 17    | 16    | 16      | p=0.040                            |
| 48 | 9     | 9     | 9     | 9     | 9     | 9       |                                    |
| 49 | 22    | 26    | 25    | 29    | 25    | 25      |                                    |
| 50 | 27    | 27    | 27    | 29    | 30    | 28      | p=0.234                            |
| 51 | 21.0  | 21.4  | 20.9  | 21.7  | 21.8  | 21.3    |                                    |
| 52 | 44.2  | 47.7  | 43.7  | 48.3  | 50.1  | 46.8    |                                    |
| 53 | 79    | 120   | 108   | 106   | 107   | 760     | p=0.484                            |
| 54 | 19.8% | 26.0% | 22.5% | 25.1% | 23.1% | 23.5%   |                                    |
| 55 | 6     | 4     | 5     | 6     | 3     | 33      | p=0.695                            |

|    |       |       |       |       |       |       |         |
|----|-------|-------|-------|-------|-------|-------|---------|
| 1  |       |       |       |       |       |       |         |
| 2  | 1.5%  | 0.9%  | 1.0%  | 1.4%  | 0.6%  | 1.0%  |         |
| 3  | 164   | 222   | 206   | 212   | 200   | 1449  | p=0.156 |
| 4  | 41.1% | 48.2% | 43.0% | 50.1% | 43.2% | 44.7% |         |
| 5  | 46    | 54    | 57    | 60    | 57    | 380   | p=0.228 |
| 6  | 11.5% | 11.7% | 11.9% | 14.2% | 12.3% | 11.7% |         |
| 7  |       |       |       |       |       |       |         |
| 8  | 56    | 59    | 50    | 50    | 68    | 409   | p=0.241 |
| 9  | 14.0% | 12.8% | 10.4% | 11.8% | 14.7% | 12.6% |         |
| 10 | 19    | 26    | 38    | 36    | 29    | 216   | p=0.139 |
| 11 | 4.8%  | 5.6%  | 7.9%  | 8.5%  | 6.3%  | 6.7%  |         |
| 12 |       |       |       |       |       |       |         |
| 13 | 101   | 87    | 95    | 80    | 99    | 636   | p=0.011 |
| 14 | 25.3% | 18.9% | 19.8% | 18.9% | 21.4% | 19.6% |         |
| 15 |       |       |       |       |       |       |         |
| 16 |       |       |       |       |       |       |         |
| 17 |       |       |       |       |       |       |         |
| 18 |       |       |       |       |       |       |         |
| 19 |       |       |       |       |       |       |         |
| 20 |       |       |       |       |       |       |         |
| 21 |       |       |       |       |       |       |         |
| 22 |       |       |       |       |       |       |         |
| 23 |       |       |       |       |       |       |         |
| 24 |       |       |       |       |       |       |         |
| 25 |       |       |       |       |       |       |         |
| 26 |       |       |       |       |       |       |         |
| 27 |       |       |       |       |       |       |         |
| 28 |       |       |       |       |       |       |         |
| 29 |       |       |       |       |       |       |         |
| 30 |       |       |       |       |       |       |         |
| 31 |       |       |       |       |       |       |         |
| 32 |       |       |       |       |       |       |         |
| 33 |       |       |       |       |       |       |         |
| 34 |       |       |       |       |       |       |         |
| 35 |       |       |       |       |       |       |         |
| 36 |       |       |       |       |       |       |         |
| 37 |       |       |       |       |       |       |         |
| 38 |       |       |       |       |       |       |         |
| 39 |       |       |       |       |       |       |         |
| 40 |       |       |       |       |       |       |         |
| 41 |       |       |       |       |       |       |         |
| 42 |       |       |       |       |       |       |         |
| 43 |       |       |       |       |       |       |         |
| 44 |       |       |       |       |       |       |         |
| 45 |       |       |       |       |       |       |         |
| 46 |       |       |       |       |       |       |         |
| 47 |       |       |       |       |       |       |         |
| 48 |       |       |       |       |       |       |         |
| 49 |       |       |       |       |       |       |         |
| 50 |       |       |       |       |       |       |         |
| 51 |       |       |       |       |       |       |         |
| 52 |       |       |       |       |       |       |         |
| 53 |       |       |       |       |       |       |         |
| 54 |       |       |       |       |       |       |         |
| 55 |       |       |       |       |       |       |         |
| 56 |       |       |       |       |       |       |         |
| 57 |       |       |       |       |       |       |         |
| 58 |       |       |       |       |       |       |         |
| 59 |       |       |       |       |       |       |         |
| 60 |       |       |       |       |       |       |         |

For peer review only

1  
2  
3  
4  
5  
6  
7  
8  
9  
10  
11  
12  
13  
14  
15  
16  
17  
18  
19  
20  
21  
22  
23  
24  
25  
26  
27  
28  
29  
30  
31  
32  
33  
34  
35  
36  
37  
38  
39  
40  
41  
42  
43  
44  
45  
46  
47  
48  
49  
50  
51  
52  
53  
54  
55  
56  
57  
58  
59  
60

For peer review only

1  
2  
3  
4  
5  
6  
7  
8  
9  
10  
11  
12  
13  
14  
15  
16  
17  
18  
19  
20  
21  
22  
23  
24  
25  
26  
27  
28  
29  
30  
31  
32  
33  
34  
35  
36  
37  
38  
39  
40  
41  
42  
43  
44  
45  
46  
47  
48  
49  
50  
51  
52  
53  
54  
55  
56  
57  
58  
59  
60

: p=0.300

For peer review only

STROBE Statement—Checklist of items that should be included in reports of *cohort studies*

|                              | Item No | Recommendation                                                                                                                                                                                                                                                                                                         | Page No |
|------------------------------|---------|------------------------------------------------------------------------------------------------------------------------------------------------------------------------------------------------------------------------------------------------------------------------------------------------------------------------|---------|
| <b>Title and abstract</b>    | 1       | (a) Indicate the study's design with a commonly used term in the title or the abstract<br>(b) Provide in the abstract an informative and balanced summary of what was done and what was found                                                                                                                          | 1       |
| <b>Introduction</b>          |         |                                                                                                                                                                                                                                                                                                                        |         |
| Background/rationale         | 2       | Explain the scientific background and rationale for the investigation being reported                                                                                                                                                                                                                                   | 5       |
| Objectives                   | 3       | State specific objectives, including any prespecified hypotheses                                                                                                                                                                                                                                                       | 6       |
| <b>Methods</b>               |         |                                                                                                                                                                                                                                                                                                                        |         |
| Study design                 | 4       | Present key elements of study design early in the paper                                                                                                                                                                                                                                                                | 7       |
| Setting                      | 5       | Describe the setting, locations, and relevant dates, including periods of recruitment, exposure, follow-up, and data collection                                                                                                                                                                                        | 7       |
| Participants                 | 6       | (a) Give the eligibility criteria, and the sources and methods of selection of participants. Describe methods of follow-up<br>(b) For matched studies, give matching criteria and number of exposed and unexposed                                                                                                      | 7       |
| Variables                    | 7       | Clearly define all outcomes, exposures, predictors, potential confounders, and effect modifiers. Give diagnostic criteria, if applicable                                                                                                                                                                               | 7       |
| Data sources/<br>measurement | 8*      | For each variable of interest, give sources of data and details of methods of assessment (measurement). Describe comparability of assessment methods if there is more than one group                                                                                                                                   | 7       |
| Bias                         | 9       | Describe any efforts to address potential sources of bias                                                                                                                                                                                                                                                              | 7       |
| Study size                   | 10      | Explain how the study size was arrived at                                                                                                                                                                                                                                                                              |         |
| Quantitative variables       | 11      | Explain how quantitative variables were handled in the analyses. If applicable, describe which groupings were chosen and why                                                                                                                                                                                           | 7       |
| Statistical methods          | 12      | (a) Describe all statistical methods, including those used to control for confounding<br>(b) Describe any methods used to examine subgroups and interactions<br>(c) Explain how missing data were addressed<br>(d) If applicable, explain how loss to follow-up was addressed<br>(e) Describe any sensitivity analyses | 7       |
| <b>Results</b>               |         |                                                                                                                                                                                                                                                                                                                        |         |
| Participants                 | 13*     | (a) Report numbers of individuals at each stage of study—eg numbers potentially eligible, examined for eligibility, confirmed eligible, included in the study, completing follow-up, and analysed<br>(b) Give reasons for non-participation at each stage<br>(c) Consider use of a flow diagram                        | 8       |
| Descriptive data             | 14*     | (a) Give characteristics of study participants (eg demographic, clinical, social) and information on exposures and potential confounders<br>(b) Indicate number of participants with missing data for each variable of interest<br>(c) Summarise follow-up time (eg, average and total amount)                         | 8/9     |
| Outcome data                 | 15*     | Report numbers of outcome events or summary measures over time                                                                                                                                                                                                                                                         | 9/10    |

|    |                          |    |                                                                                                                                                                                                              |       |
|----|--------------------------|----|--------------------------------------------------------------------------------------------------------------------------------------------------------------------------------------------------------------|-------|
| 1  | Main results             | 16 | (a) Give unadjusted estimates and, if applicable, confounder-adjusted estimates and their precision (eg, 95% confidence interval). Make clear which confounders were adjusted for and why they were included | 9/10  |
| 2  |                          |    | (b) Report category boundaries when continuous variables were categorized                                                                                                                                    |       |
| 3  |                          |    | (c) If relevant, consider translating estimates of relative risk into absolute risk for a meaningful time period                                                                                             |       |
| 4  |                          |    |                                                                                                                                                                                                              |       |
| 5  | Other analyses           | 17 | Report other analyses done—eg analyses of subgroups and interactions, and sensitivity analyses                                                                                                               | 11/12 |
| 6  | <b>Discussion</b>        |    |                                                                                                                                                                                                              |       |
| 7  | Key results              | 18 | Summarise key results with reference to study objectives                                                                                                                                                     | 13    |
| 8  | Limitations              | 19 | Discuss limitations of the study, taking into account sources of potential bias or imprecision. Discuss both direction and magnitude of any potential bias                                                   | 16    |
| 9  | Interpretation           | 20 | Give a cautious overall interpretation of results considering objectives, limitations, multiplicity of analyses, results from similar studies, and other relevant evidence                                   | 13    |
| 10 | Generalisability         | 21 | Discuss the generalisability (external validity) of the study results                                                                                                                                        | 13    |
| 11 | <b>Other information</b> |    |                                                                                                                                                                                                              |       |
| 12 | Funding                  | 22 | Give the source of funding and the role of the funders for the present study and, if applicable, for the original study on which the present article is based                                                | 17    |

\*Give information separately for exposed and unexposed groups.

**Note:** An Explanation and Elaboration article discusses each checklist item and gives methodological background and published examples of transparent reporting. The STROBE checklist is best used in conjunction with this article (freely available on the Web sites of PLoS Medicine at <http://www.plosmedicine.org/>, Annals of Internal Medicine at <http://www.annals.org/>, and Epidemiology at <http://www.epidem.com/>). Information on the STROBE Initiative is available at <http://www.strobe-statement.org>.
